# Supplementary material
Source: MDPI journal article supplement (https://www.mdpi.com/2076-3417/9/20/4352)
Supplement: s1 [file s1]

# NOMENCLATURE

$r_l$  = racket length (mm);  $g_l$  = grip length (mm);  $h_{le}$  = head external length (mm);  $h_{li}$  = head internal length (mm);  $h_{we}$  = head external width (mm);  $h_{wi}$  = head internal width (mm);  $d_{max}$  = maximum depth (mm);  $d_{min}$  = minimum depth (mm);  $S_m$  = number of main strings;  $S_c$  = number of cross strings;  $m$  = mass (g);  $com$  = centre of mass (mm);  $f_n$  = natural frequency (Hz);  $\zeta$  = damping ratio. Materials coding: 1- wood; 2- steel; 3- aluminium; 4- composite; 5- wood + metal; 6- wood + composite; 7- metal + composite.

| #  | Manufacturer       | Name          | Year | $r_l$ | $g_l$ | $h_{le}$ | $h_{li}$ | $h_{we}$ | $h_{wi}$ | $d_{max}$ | $d_{min}$ | $S_m$ | $S_c$ | $m$   | co<br>m | $f_n$ | $\zeta$ | Material |
|----|--------------------|---------------|------|-------|-------|----------|----------|----------|----------|-----------|-----------|-------|-------|-------|---------|-------|---------|----------|
| 1  | -                  | -             | 1874 | 677   | 274   | 257      | 244      | 201      | 177      | 25.5      | 20.0      | 18    | 16    | 359.7 | 382     | 106   | 0.945   | 1        |
| 2  | Fortnam            | -             | 1874 | 670   | 298   | 258      | 244      | 198      | 173      | 22.0      | 19.8      | 18    | 18    | 385.1 | 364     | 108   | 0.89    | 1        |
| 3  | F.H. Ayres         | -             | 1874 | 682   | 280   | 260      | 248      | 195      | 172      | 19.0      | 16.7      | 18    | 20    | 325.3 | 346     | 72    | 2.41    | 1        |
| 4  | ?                  | Sphairistike  | 1874 | 682   | 242   | 252      | 238      | 181      | 161      | 18.8      | 16.9      | 18    | 20    | 253.4 | 344     | 95    | 2.25    | 1        |
| 5  | Lambert            | -             | 1874 | 679   | 299   | 243      | 230      | 220      | 175      | 21.6      | 20.0      | 18    | 19    | 347.7 | 366     | 119   | 0.96    | 1        |
| 6  | Henry Malings      | -             | 1874 | 685   | 275   | 263      | 250      | 210      | 190      | 19.0      | 17.2      | 18    | 19    | 296.7 | 358     | 92    | 0.885   | 1        |
| 7  | Henry Malings      | -             | 1874 | 680   | 270   | 260      | 247      | 203      | 182      | 22.2      | 19.2      | 18    | 19    | 353.2 | 361     | 109   | 0.93    | 1        |
| 8  | Henry Malings      | -             | 1874 | 678   | 258   | 253      | 241      | 205      | 186      | 22.5      | 20.1      | 18    | 19    | 301.8 | 376     | 98    | 0.855   | 1        |
| 9  | Henry Malings      | -             | 1874 | 674   | 258   | 273      | 256      | 213      | 184      | 21.9      | 19.7      | 18    | 17    | 305.5 | 367     | 98    | 0.83    | 1        |
| 10 | ?                  | ?             | 1875 | 681   | 287   | 258      | 246      | 210      | 187      | 21.6      | 19.8      | 18    | 17    | 312.1 | 353     | 95.5  | 1.03    | 1        |
| 11 | -                  | -             | 1875 | 673   | 280   | 260      | 248      | 210      | 186      | 21.0      | 19.7      | 20    | 16    | 360.8 | 360     | 106   | 0.85    | 1        |
| 12 | -                  | -             | 1875 | 658   | 270   | 270      | 255      | 215      | 189      | 20.0      | 18.3      | 18    | 19    | 352.6 | 350     | 92    | 0.985   | 1        |
| 13 | F.H. Ayres         | -             | 1875 | 681   | 290   | 252      | 240      | 195      | 171      | 21.4      | 18.1      | 18    | 18    | 374.3 | 341     | 113   | 1.015   | 1        |
| 14 | Jeffries           | -             | 1875 | 672   | 278   | 262      | 249      | 215      | 190      | 21.1      | 17.7      | 18    | 18    | 376.5 | 373     | 101   | 2.09    | 1        |
| 15 | -                  | -             | 1875 | 673   | 291   | 262      | 251      | 211      | 183      | 21.8      | 18.8      | 18    | 18    | 403.9 | 336     | 105   | 1.495   | 1        |
| 16 | F.H. Ayres         | -             | 1876 | 688   | 309   | 244      | 231      | 187      | 160      | 23.1      | 22.0      | 18    | 17    | 349.2 | 345     | 101   | 1.07    | 1        |
| 17 | -                  | -             | 1877 | 646   | 266   | 251      | 235      | 233      | 199      | 18.2      | 17.3      | 18    | 17    | 304   | 333     | 89    | 1.24    | 1        |
| 18 | -                  | -             | 1878 | 688   | 269   | 277      | 264      | 208      | 182      | 22.5      | 18.2      | 22    | 28    | 352.6 | 368     | 95    | 1.2     | 1        |
| 19 | George Bussey & Co | -             | 1878 | 662   | 269   | 270      | 255      | 219      | 188      | 21.5      | 20.8      | 18    | 17    | 426.6 | 358     | 113.5 | 1.53    | 1        |
| 20 | F.H. Ayres         | The Champion  | 1878 | 684   | 259   | 280      | 267      | 215      | 189      | 22.5      | 19.6      | 20    | 21    | 366.4 | 345     | 91    | 1.115   | 1        |
| 21 | Feltham            | The Alexandra | 1879 | 652   | 274   | 256      | 244      | 207      | 182      | 22.6      | 20.2      | 18    | 15    | 362.2 | 336     | 118   | 0.885   | 1        |
| 22 | Feltham            | The Alexandra | 1879 | 677   | 275   | 263      | 249      | 209      | 182      | 22.7      | 20.0      | 18    | 18    | 380.2 | 350     | 115   | 0.74    | 1        |
| 23 | Bussey & Co        | -             | 1879 | 685   | 285   | 261      | 245      | 222      | 187      | 23.0      | 21.4      | 18    | 18    | 417.9 | 366     | 101.5 | 3.105   | 1        |
| 24 | Slazenger          | Demon         | 1880 | 686   | 240   | 284      | 271      | 225      | 200      | 21.5      | 19.5      | 20    | 21    | 381.9 | 355     | 105.5 | 1.04    | 1        |
| 25 | -                  | -             | 1880 | 661   | 310   | 240      | 226      | 206      | 183      | 18.0      | 16.1      | 18    | 18    | 342.6 | 349     | 100   | 1.09    | 1        |
| 26 | Jeffries           | The Champion  | 1880 | 684   | 220   | 277      | 266      | 232      | 208      | 19.6      | 17.5      | 18    | 22    | 409.4 | 368     | 84.5  | 1.885   | 1        |
| 27 | Feltham            | Zingari       | 1880 | 677   | 295   | 261      | 248      | 221      | 196      | 21.4      | 20.0      |       |       | 382.6 | 370     | 92    | 2.2     | 1        |
| 28 | Parkins & Gott     | -             | 1880 | 678   | 231   | 272      | 256      | 232      | 202      | 20.5      | 18.7      | 18    | 22    | 360.6 | 353     | 91.5  | 2.02    | 1        |
| 29 | F.H. Ayres         | -             | 1880 | 672   | 300   | 248      | 236      | 185      | 157      | 22.7      | 20.0      | 18    | 17    | 376.5 | 338     | 124   | 1.875   | 1        |
| 30 | F.H. Ayres         | Tournament    | 1880 | 681   | 285   | 271      | 261      | 231      | 211      | 21.3      | 19.2      | 18    | 18    | 360.8 | 352     | 69.5  |         | 1        |
| 31 | -                  | -             | 1882 | 661   | 285   | 271      | 262      | 220      | 193      | 20.1      | 18.0      | 18    | 19    | 287.2 | 353     | 77    | 1.13    | 1        |
| 32 | -                  | Zingari       | 1883 | 692   | 322   | 279      | 275      | 210      | 175      | 20.2      | 19.5      |       |       | 429.7 | 361     | 110   | 1.115   | 1        |
| 33 | Reproduction       | Reproduction  | 1884 | 681   | 191   | 276      | 261      | 231      | 211      | 20.2      | 18.7      | 18    | 24    | 349.8 | 351     | 105   | 1.375   | 1        |
| 34 | Reproduction       | Reproduction  | 1884 | 688   | 238   | 288      | 276      | 225      | 199      | 20.5      | 19.3      | 18    | 20    | 323.4 | 358     | 86    | 1.2     | 1        |

|    |                              |                      |      |     |     |     |     |     |     |      |      |    |    |       |     |       |       |   |
|----|------------------------------|----------------------|------|-----|-----|-----|-----|-----|-----|------|------|----|----|-------|-----|-------|-------|---|
| 35 | Feltham                      | ?                    | 1885 | 694 | 274 | 285 | 273 | 230 | 205 | 21.0 | 19.3 | 18 | 19 | 384   | 366 | 89    | 0.82  | 1 |
| 36 | J.A. & N. Yorkhouse          | -                    | 1885 | 683 | 291 | 269 | 254 | 219 | 190 | 22.2 | 20.0 | 18 | 19 | 378.1 | 354 | 91    | 1.18  | 1 |
| 37 | Feltham                      | Argosy               | 1885 | 683 | 277 | 293 | 279 | 224 | 196 | 21.0 | 18.5 | 18 | 21 | 384.8 | 365 | 85.5  | 1.465 | 1 |
| 38 | Reproduction                 | Reproduction         | 1885 | 680 | 192 | 275 | 262 | 230 | 208 | 20.8 | 17.4 | 18 | 25 | 321.1 | 369 | 94.5  | 0     | 1 |
| 39 | Reproduction                 | Reproduction         | 1885 | 683 | 210 | 281 | 265 | 234 | 220 | 21.0 | 19.3 | 18 | 22 | 373.5 | 360 | 97    | 1.53  | 1 |
| 40 | F.H. Ayres                   | -                    | 1886 | 687 | 217 | 289 | 275 | 234 | 206 | 20.2 | 17.2 | 22 | 28 | 401.5 | 356 | 99    | 0.87  | 1 |
| 41 | Reproduction                 | Reproduction         | 1886 | 682 | 191 | 285 | 271 | 225 | 211 | 18.5 | 17.5 | 18 | 20 | 295.1 | 360 | 87    | 1.04  | 1 |
| 42 | Metallic Racquet Corporation | -                    | 1887 | 696 | 355 | 328 | 315 | 227 | 204 | 13.0 | 12.6 | 16 | 20 | 408.7 | 371 | 114   | 0.51  | 2 |
| 43 | Peck & Snyder                | -                    | 1887 | 682 | 293 | 307 | 294 | 223 | 196 | 19.9 | 18.5 | 20 | 24 | 315.2 | 380 | 100   | 0.915 | 1 |
| 44 | F.H. Ayres                   | -                    | 1887 | 668 | 304 | 268 | 254 | 223 | 198 | 22.6 | 19.2 | 18 | 17 | 388.8 | 382 | 115   | 1.205 | 1 |
| 45 | Feltham                      | -                    | 1887 | 695 | 282 | 304 | 291 | 222 | 196 | 21.6 | 19.9 | 18 | 20 | 372   | 377 | 93    | 0.96  | 1 |
| 46 | Feltham                      | Marvel               | 1887 | 682 | 287 | 268 | 252 | 235 | 203 | 20.5 | 19.9 | 18 | 16 | 390   | 367 | 81    | 2.655 | 1 |
| 47 | F.H. Ayres                   | The Champion         | 1887 | 690 | 268 | 274 | 261 | 217 | 192 | 20.9 | 19.3 | 18 | 22 | 364.2 | 373 | 93    | 1.23  | 1 |
| 48 | F.H. Ayres                   | -                    | 1887 | 662 | 311 | 284 | 277 | 218 | 193 | 18.8 | 16.0 | 19 | 20 | 288.7 | 370 | 73.5  | 3.74  | 1 |
| 49 | -                            | The Youth            | 1887 | 671 | 248 | 278 | 266 | 210 | 174 | 19.5 | 18.1 | 18 | 21 | 296.2 | 342 | 107.5 | 1.235 | 1 |
| 50 | Reproduction                 | Reproduction         | 1887 | 680 | 231 | 271 | 261 | 228 | 210 | 21.0 | 18.2 | 18 | 21 | 352.5 | 364 | 101   | 1.345 | 1 |
| 51 | F.H. Ayres                   | The Superior         | 1888 | 672 | 285 | 280 | 266 | 210 | 187 | 22.7 | 19.0 |    |    | 379.7 | 361 | 102   | 1.97  | 1 |
| 52 | Feltham                      | -                    | 1888 | 690 | 243 | 300 | 288 | 223 | 198 | 21.8 | 19.6 | 18 | 20 | 364.5 | 371 | 95.5  | 0.985 | 1 |
| 53 | Feltham                      | -                    | 1888 | 689 | 250 | 291 | 277 | 220 | 192 | 21.6 | 20.4 | 18 | 21 | 349.8 | 362 | 104   | 1.865 | 1 |
| 54 | -                            | Experimental racket  | 1888 | 681 | 265 | 298 | 285 | 230 | 182 | 21.6 | 19.5 | 20 | 21 | 366.5 | 350 | 103   | 1.115 | 1 |
| 55 | Slazenger                    | -                    | 1889 | 710 | 249 | 291 | 278 | 210 | 172 | 20.9 | 18.6 | 18 | 24 | 383.2 | 370 | 107   | 1.51  | 1 |
| 56 | -                            | -                    | 1890 | 695 | 232 | 292 | 280 | 230 | 203 | 21.7 | 17.2 | 22 | 24 | 368.4 | 340 | 94    | 1.2   | 1 |
| 57 | -                            | J L                  | 1890 | 690 | 234 | 286 | 273 | 227 | 201 | 20.5 | 18.7 | 18 | 24 | 342.9 | 363 | 94    | 0.845 | 1 |
| 58 | -                            | Olympian             | 1890 | 688 | 260 | 294 | 283 | 223 | 197 | 19.9 | 17.9 | 18 | 23 | 356.4 | 346 | 88    | 1.16  | 1 |
| 59 | -                            | Excelsior            | 1890 | 682 | 248 | 288 | 276 | 228 | 202 | 20.9 | 19.6 | 18 | 22 | 368.2 | 373 | 96.5  | 1.09  | 1 |
| 60 | -                            | The Association no.3 | 1890 | 689 | 260 | 296 | 283 | 210 | 184 | 21.1 | 16.1 | 18 | 25 | 369.9 | 355 | 103.5 | 1.09  | 1 |
| 61 | Slazenger                    | Demon                | 1890 | 692 | 250 | 285 | 274 | 215 | 193 | 21.4 | 20.4 | 18 | 22 | 375.6 | 367 | 99    | 3.24  | 1 |
| 62 | -                            | -                    | 1890 | 662 | 210 | 270 | 257 | 247 | 219 | 20.3 | 17.3 | 18 | 22 | 347.3 | 359 | 89    | 3.39  | 1 |
| 63 | Slazenger                    | Demon                | 1890 | 697 | 238 | 298 | 284 | 215 | 189 | 21.0 | 19.6 | 18 | 21 | 374.9 | 371 | 102   | 0     | 1 |
| 64 | Slazenger                    | Special              | 1895 | 686 | 225 | 300 | 288 | 218 | 194 | 19.5 | 18.5 | 18 | 23 | 365.7 | 344 | 94    | 1.16  | 1 |
| 65 | -                            | Falcon               | 1895 | 688 | 230 | 289 | 275 | 223 | 196 | 20.1 | 18.5 | 18 | 20 | 341.8 | 349 | 85    | 0.965 | 1 |
| 66 | Slazenger                    | Demon                | 1895 | 697 | 234 | 313 | 301 | 196 | 170 | 20.1 | 17.8 | 18 | 23 | 349.4 | 339 | 109   | 1.61  | 1 |
| 67 | -                            | -                    | 1895 | 688 | 215 | 307 | 296 | 221 | 195 | 20.1 | 18.9 | 17 | 21 | 329.4 | 346 | 88    | 1.19  | 1 |
| 68 | -                            | The Globe            | 1895 | 685 | 240 | 282 | 270 | 223 | 198 | 20.0 | 18.6 | 18 | 21 | 357.6 | 352 | 98    | 0.905 | 1 |
| 69 | George Bussey & Co           | The Royal            | 1896 | 695 | 165 | 317 | 305 | 200 | 176 | 20.8 | 18.3 | 18 | 30 | 385.8 | 349 | 107   | 1.15  | 1 |
| 70 | F.H. Ayres                   | The Ensign           | 1897 | 690 | 210 | 290 | 278 | 232 | 208 | 21.2 | 19.6 | 18 | 20 | 377.1 | 369 | 100   | 0.87  | 1 |
| 71 | Slazenger                    | The Renshaw          | 1900 | 698 | 217 | 294 | 283 | 208 | 184 | 20.1 | 18.4 | 18 | 26 | 344.5 | 363 | 82    | 3.525 | 1 |
| 72 | Slazenger                    | Demon                | 1900 | 691 | 240 | 288 | 277 | 210 | 186 | 21.5 | 19.0 | 18 | 24 | 396.7 | 354 | 111   | 0.89  | 1 |
| 73 | Slazenger                    | Demon                | 1900 | 687 | 230 | 296 | 282 | 232 | 203 | 21.0 | 17.8 | 18 | 22 | 411.3 | 351 | 102   | 0.905 | 1 |
| 74 | -                            | The Tournament no. 3 | 1900 | 679 | 235 | 305 | 293 | 218 | 195 | 21.0 | 18.0 | 20 | 20 | 337.1 | 346 | 99    | 1.505 | 1 |
| 75 | Slazenger                    | Doherty              | 1900 | 685 | 218 | 294 | 281 | 224 | 198 | 22.0 | 18.2 | 20 | 23 | 424.3 | 328 | 88    | 1.835 | 1 |

|     |                        |                       |      |     |     |     |     |     |     |      |      |    |    |       |     |       |       |   |
|-----|------------------------|-----------------------|------|-----|-----|-----|-----|-----|-----|------|------|----|----|-------|-----|-------|-------|---|
| 76  | Hunter & Vaughan       | The Handicap          | 1900 | 697 | 210 | 320 | 306 | 215 | 185 | 21.8 | 18.9 | 18 | 22 | 405   | 353 | 104   | 1.095 | 1 |
| 77  | Spalding & Bros        | -                     | 1900 | 696 | 180 | 291 | 280 | 224 | 199 | 20.0 | 18.5 | 18 | 22 | 382.1 | 361 | 102.5 | 1.67  | 1 |
| 78  | Bussey                 | -                     | 1900 | 670 | 212 | 300 | 289 | 206 | 178 | 19.0 | 18.0 | 18 | 23 | 293.1 | 329 | 96.5  | 1.075 | 1 |
| 79  | -                      | Defiance              | 1900 | 677 | 223 | 291 | 281 | 230 | 203 | 20.5 | 17.4 | 20 | 22 | 333   | 347 | 83    | 1.46  | 1 |
| 80  | ?                      | ?                     | 1900 | 700 | 260 | 284 | 272 | 214 | 190 | 22.0 | 18.2 | 18 | 27 | 364.4 | 367 | 101   | 1.14  | 1 |
| 81  | Unknown                | -                     | 1900 | 690 | 216 | 302 | 289 | 216 | 189 | 20.0 | 18.0 | 20 | 23 | 420.6 | 332 | 85    | 3.58  | 1 |
| 82  | Slazenger              | Demon                 | 1904 | 697 | 248 | 298 | 285 | 206 | 178 | 21.4 | 19.5 | 18 | 24 | 363.5 | 351 | 105   | 1.04  | 1 |
| 83  | -                      | -                     | 1904 | 683 | 224 | 300 | 287 | 227 | 204 | 21.5 | 16.0 | 16 | 20 | 351.2 | 322 | 88    | 1.135 | 1 |
| 84  | Spalding & Bros        | -                     | 1904 | 685 | 192 | 310 | 296 | 221 | 193 | 19.9 | 16.5 | 20 | 23 | 371.6 | 340 | 93    | 1.005 | 1 |
| 85  | Gustav Steidel         | -                     | 1904 | 695 | 225 | 305 | 293 | 225 | 200 | 20.0 | 17.5 | 18 | 25 | 375.6 | 338 | 83    | 2.035 | 1 |
| 86  | Slazenger              | Doherty               | 1904 | 703 | 220 | 323 | 313 | 200 | 174 | 22.0 | 19.0 | 18 | 21 | 412   | 312 | 102   | 2.54  | 1 |
| 87  | Spalding & Bros        | Gold Medal            | 1905 | 682 | 202 | 302 | 288 | 224 | 194 | 19.9 | 17.7 | 20 | 20 | 375.1 | 355 | 103.5 | 0.985 | 1 |
| 88  | -                      | Luyssols              | 1905 | 680 | 209 | 307 | 295 | 225 | 198 | 18.0 | 16.2 | 18 | 25 | 329.5 | 345 | 82    | 1.125 | 1 |
| 89  | Sykes                  | Empire Special        | 1905 | 688 | 240 | 304 | 292 | 216 | 193 | 22.0 | 18.3 | 18 | 22 | 412.3 | 337 | 105   | 0.97  | 1 |
| 90  | Hope Brothers          | Gaiety                | 1905 | 680 | 212 | 310 | 298 | 225 | 197 | 20.6 | 17.3 | 18 | 23 | 375.8 | 346 | 91    | 1.4   | 1 |
| 91  | Forrester & Sons       | Club                  | 1905 | 715 | 204 | 322 | 310 | 197 | 171 | 20.0 | 17.0 | 18 | 22 | 376.8 | 349 | 90    | 1.3   | 1 |
| 92  | E.J. Riley             | The Windsor           | 1905 | 690 | 228 | 293 | 283 | 230 | 206 | 18.0 | 16.2 | 20 | 22 | 350.8 | 349 | 84    |       | 1 |
| 93  | -                      | -                     | 1905 | 689 | 234 | 298 | 286 | 210 | 185 | 19.7 | 17.4 | 20 | 22 | 360.4 | 354 | 86.5  | 1.02  | 1 |
| 94  | Slazenger              | The Player            | 1906 | 692 | 207 | 299 | 286 | 229 | 202 | 19.7 | 17.5 | 18 | 24 | 389.4 | 346 | 94    | 1.165 | 1 |
| 95  | Spalding & Bros        | Greenwood             | 1906 | 685 | 197 | 295 | 282 | 223 | 195 | 19.2 | 16.5 | 16 | 20 | 402.8 | 345 | 96    | 0.955 | 1 |
| 96  | -                      | Club                  | 1906 | 690 | 225 | 293 | 280 | 228 | 198 | 19.0 | 17.0 | 16 | 19 | 362.2 | 343 | 87    | 0.98  | 1 |
| 97  | -                      | Eaton                 | 1907 | 692 | 225 | 318 | 305 | 226 | 199 | 20.7 | 14.8 | 20 | 22 | 385.2 | 346 | 104   | 1.1   | 1 |
| 98  | Spalding & Bros        | Hackett and Alexander | 1908 | 686 | 200 | 316 | 304 | 233 | 203 | 20.0 | 15.0 | 20 | 21 | 406.7 | 335 | 108   | 0.96  | 1 |
| 99  | E.J. Riley             | The Club              | 1910 | 681 | 220 | 302 | 291 | 231 | 221 | 20.6 | 18.8 | 18 | 22 | 352   | 342 | 86    | 1.155 | 1 |
| 100 | -                      | Practice              | 1910 | 677 | 208 | 306 | 294 | 234 | 207 | 21.0 | 17.0 | 20 | 19 | 399.8 | 336 | 89    | 0.925 | 1 |
| 101 | -                      | Winner                | 1910 | 690 | 209 | 301 | 289 | 225 | 199 | 19.9 | 17.9 | 18 | 19 | 376.6 | 346 | 85.5  | 1.08  | 1 |
| 102 | -                      | Imperial              | 1910 | 681 | 202 | 305 | 293 | 226 | 201 | 20.3 | 17.5 | 18 | 21 | 393.1 | 331 | 103.5 | 1.17  | 1 |
| 103 | -                      | The Eastbourne        | 1910 | 687 | 203 | 305 | 291 | 230 | 204 | 18.8 | 15.7 | 20 | 21 | 337   | 335 | 78.5  |       | 1 |
| 104 | -                      | Challenge             | 1910 | 680 | 210 | 302 | 291 | 221 | 198 | 19.8 | 16.3 | 20 | 23 | 358.4 | 327 | 83    | 1.115 | 1 |
| 105 | -                      | -                     | 1910 | 695 | 280 | 312 | 302 | 212 | 188 | 20.1 | 17.4 | 16 | 20 | 265.4 | 351 | 85    |       | 1 |
| 106 | Jeffries               | Marvel                | 1910 | 690 | 225 | 325 | 312 | 224 | 196 | 18.7 | 16.0 | 18 | 19 | 345.4 | 358 | 82    | 1.9   | 1 |
| 107 | -                      | -                     | 1910 | 677 | 236 | 301 | 295 | 225 | 195 | 19.5 | 18.3 | 20 | 19 | 342.1 | 322 | 95.5  | 1.99  | 1 |
| 108 | -                      | Special               | 1910 | 671 | 191 | 301 | 290 | 230 | 211 | 22.1 | 20.0 | 20 | 21 | 440   | 323 | 104   | 0.975 | 1 |
| 109 | -                      | Leo                   | 1910 | 675 | 232 | 291 | 272 | 228 | 201 | 21.2 | 17.7 | 20 | 19 | 361   | 336 | 95.5  | 0.72  | 1 |
| 110 | J.E. Beale             | Wimbledon             | 1910 | 691 | 228 | 301 | 291 | 200 | 175 | 21.3 | 18.4 | 20 | 24 | 346.8 | 356 | 85    | 2.195 | 1 |
| 111 | Bussey & Co            | Club                  | 1910 | 681 | 171 | 301 | 291 | 230 | 205 | 21.2 | 17.6 | 20 | 21 | 388.2 | 329 | 90    | 1.35  | 1 |
| 112 | -                      | The Eton              | 1911 | 681 | 221 | 291 | 280 | 225 | 197 | 18.5 | 17.3 | 19 | 18 | 355.8 | 333 | 96    | 1.115 | 1 |
| 113 | William & Co. Of Paris | Driva                 | 1911 | 690 | 190 | 320 | 287 | 222 | 191 | 21.1 | 18.2 | 20 | 21 | 423.1 | 336 | 89    | 1.775 | 1 |
| 114 | Ardee                  | Rownforth             | 1912 | 695 | 200 | 300 | 285 | 222 | 193 | 17.9 | 17.3 | 20 | 20 | 381.9 | 350 | 88    | 0.935 | 1 |
| 115 | J. Holden              | -                     | 1912 | 685 | 244 | 307 | 294 | 232 | 205 | 22.5 | 20.3 | 18 | 22 | 362.3 | 336 | 101   | 1.16  | 1 |
| 116 | Wright & Ditson        | St George             | 1912 | 682 | 207 | 327 | 313 | 232 | 200 | 20.4 | 16.3 | 20 | 24 | 396   | 328 | 103   | 0.985 | 1 |
| 117 | Banco                  | Swift                 | 1912 | 687 | 240 | 305 | 291 | 213 | 197 | 20.8 | 18.5 | 20 | 20 | 402   | 330 | 93    | 1.13  | 1 |

|     |                              |                   |      |     |     |     |     |     |     |      |      |    |    |       |     |       |       |   |
|-----|------------------------------|-------------------|------|-----|-----|-----|-----|-----|-----|------|------|----|----|-------|-----|-------|-------|---|
| 118 | Allan Straker                | Straker's Special | 1913 | 692 | 292 | 311 | 302 | 199 | 169 | 24.7 | 19.5 | 18 | 22 | 399.2 | 337 | 117.5 | 0.975 | 1 |
| 119 | -                            | Court             | 1913 | 681 | 221 | 312 | 301 | 231 | 201 | 20.6 | 17.1 | 20 | 21 | 369.3 | 323 | 82    | 1.215 | 1 |
| 120 | -                            | The Match         | 1915 | 684 | 248 | 308 | 294 | 230 | 202 | 21.0 | 18.5 | 20 | 18 | 353.3 | 341 | 99    | 0.92  | 1 |
| 121 | -                            | The Club          | 1915 | 68  | 239 | 298 | 287 | 218 | 192 | 23.0 | 16.3 | 20 | 22 | 363   | 334 | 96.5  | 1.325 | 1 |
| 122 | -                            | International     | 1915 | 685 | 210 | 318 | 306 | 234 | 208 | 19.8 | 17.0 | 22 | 23 | 322.1 | 343 | 87    | 1.095 | 1 |
| 123 | ?                            | ?                 | 1915 | 690 | 190 | 302 | 288 | 227 | 198 | 20.2 | 18.4 | 19 | 22 | 423   | 336 | 89    | 1.775 | 1 |
| 124 | William Sykes                | The Mask          | 1915 | 671 | 213 | 312 | 291 | 219 | 191 | 21.9 | 19.2 | 20 | 23 | 394.4 | 341 | 108   | 1.19  | 1 |
| 125 | -                            | The Royal         | 1915 | 662 | 211 | 321 | 310 | 215 | 190 | 21.2 | 18.5 | 18 | 22 | 348.7 | 328 | 106.5 | 1.525 | 1 |
| 126 | Slazenger                    | Doherty           | 1916 | 688 | 211 | 310 | 300 | 210 | 186 | 20.4 | 18.0 | 18 | 22 | 376.2 | 323 | 86.5  |       | 1 |
| 127 | A.W. Phillips                | Practice          | 1916 | 674 | 211 | 299 | 284 | 225 | 202 | 18.6 | 17.2 | 20 | 21 | 326.9 | 317 | 81    | 1.3   | 1 |
| 128 | J. & S. Sheffield            | Sovereign         | 1917 | 692 | 214 | 308 | 294 | 219 | 191 | 19.6 | 16.6 | 20 | 22 | 394.9 | 345 | 95    | 1.255 | 1 |
| 129 | -                            | -                 | 1917 | 675 | 140 | 297 | 287 | 235 | 209 | 20.4 | 19.1 | 20 | 20 | 386   | 339 | 67.5  | 5.16  | 1 |
| 130 | Hobbies                      | Courtland         | 1918 | 680 | 150 | 300 | 292 | 229 | 212 | 14.3 | 12.0 | 16 | 19 | 398.8 | 340 | 93    | 0.395 | 5 |
| 131 | Hobbies                      | -                 | 1918 | 688 | 158 | 365 | 360 | 224 | 212 | 13.0 | 11.5 | 20 | 25 | 390.5 | 333 | 78    | 0.545 | 5 |
| 132 | William Sykes                | -                 | 1920 | 684 | 220 | 300 | 289 | 226 | 200 | 19.7 | 16.4 | 20 | 23 | 346.1 | 346 | 85    | 2.275 | 1 |
| 133 | Slazenger                    | Doherty           | 1920 | 685 | 180 | 297 | 285 | 228 | 204 | 19.6 | 17.7 | 20 | 22 | 389.2 | 326 | 94    | 0.805 | 1 |
| 134 | H.E. Hayward                 | George            | 1920 | 681 | 213 | 311 | 299 | 234 | 206 | 21.3 | 18.5 | 20 | 21 | 368.6 | 336 | 88    | 1.12  | 1 |
| 135 | Geo.G. Bussey & Co           | Oxonian           | 1920 | 690 | 155 | 310 | 298 | 224 | 198 | 21.6 | 18.8 | 20 | 21 | 402.9 | 336 | 96    | 2.47  | 1 |
| 136 | -                            | College           | 1920 | 680 | 217 | 298 | 285 | 232 | 206 | 19.2 | 17.7 | 20 | 22 | 387.9 | 351 | 95.5  | 0.95  | 1 |
| 137 | Clapshaw & Cleave            | Club              | 1920 | 676 | 229 | 300 | 286 | 228 | 202 | 20.1 | 18.6 | 20 | 20 | 364   | 367 | 109.5 | 1.175 | 1 |
| 138 | William Sykes                | The Drake         | 1920 | 689 | 213 | 309 | 298 | 218 | 191 | 19.6 | 17.5 | 20 | 23 | 359.9 | 347 | 90    | 1.25  | 1 |
| 139 | Slazenger                    | -                 | 1920 | 687 | 227 | 297 | 284 | 230 | 204 | 21.1 | 19.6 | 20 | 22 | 336.4 | 350 | 97    | 1.065 | 1 |
| 140 | Jacques                      | Magpie            | 1920 | 703 | 210 | 326 | 312 | 215 | 187 | 14.7 | 13.2 | 20 | 22 | 363.5 | 355 | 96    | 0.64  | 1 |
| 141 | Slazenger                    | Special Demon     | 1920 | 693 | 231 | 314 | 301 | 223 | 196 | 19.4 | 17.6 | 20 | 22 | 414.2 | 345 | 93.5  | 0.99  | 1 |
| 142 | -                            | Roehampton        | 1920 | 701 | 221 | 328 | 316 | 215 | 190 | 21.0 | 19.0 | 20 | 20 | 367.9 | 332 | 93.5  | 1.74  | 1 |
| 143 | F.A. Davis                   | -                 | 1920 | 687 | 229 | 311 | 297 | 220 | 192 | 22.3 | 20.0 | 20 | 20 | 377.2 | 332 | 105.5 | 0.83  | 1 |
| 144 | Spalding & Bros              | Slocum            | 1920 | 683 | 200 | 301 | 286 | 230 | 200 | 20.4 | 17.4 | 20 | 20 | 354.2 | 350 | 103   | 0.8   | 1 |
| 145 | Harry C. Lee & Co            | Maxim             | 1920 | 689 | 200 | 307 | 294 | 223 | 197 | 19.0 | 17.5 | 18 | 22 | 380.4 | 333 | 100.5 | 0.49  | 1 |
| 146 | Dayton Steel Racket Company  | Dayton            | 1920 | 690 | 180 | 376 | 369 | 228 | 212 | 12.0 | 11.8 | 20 | 25 | 372.4 | 331 | 90    | 0.6   | 5 |
| 147 | Slazenger                    | Patterson         | 1921 | 697 | 217 | 311 | 296 | 215 | 187 | 20.0 | 16.4 | 18 | 22 | 372   | 341 | 105   | 1.205 | 1 |
| 148 | Dayton Steel Racket Company  | Dayton            | 1922 | 681 | 187 | 324 | 306 | 230 | 212 | 12.2 | 11.2 | 16 | 18 | 368.8 | 327 | 98.5  | 0.48  | 5 |
| 149 | Birmingham Aluminium Casting | Birmal            | 1924 | 661 | 190 | 298 | 288 | 220 | 211 | 16.3 | 14.3 | 22 | 25 | 378.9 | 330 | 77    | 0.465 | 3 |
| 150 | Jacques                      | All England       | 1924 | 690 | 242 | 316 | 287 | 220 | 196 | 21.8 | 18.2 | 20 | 21 | 342.3 | 330 | 102   | 0.745 | 1 |
| 151 | Allen West Company           | -                 | 1924 | 682 | 182 | 363 | 356 | 220 | 203 | 13.0 | 11.5 | 20 | 22 | 374.4 | 333 | 96    | 0.34  | 5 |
| 152 | Henry A Murton               | St. Peter         | 1925 | 683 | 220 | 305 | 291 | 232 | 207 | 19.0 | 16.4 | 18 | 22 | 349.8 | 316 | 88    | 0.77  | 1 |
| 153 | Dayton Steel Racket Company  | -                 | 1925 | 684 | 190 | 326 | 305 | 225 | 208 | 12.0 | 11.1 | 20 | 24 | 401.3 | 344 | 97.5  | 0.36  | 5 |
| 154 | -                            | College           | 1925 | 661 | 220 | 285 | 273 | 220 | 196 | 19.2 | 17.0 | 20 | 20 | 312.5 | 317 | 90.5  | 1.3   | 1 |
| 155 | Prosser & Sons               | Mead Marvel       | 1925 | 679 | 239 | 294 | 283 | 230 | 206 | 20.1 | 16.4 | 20 | 22 | 375.4 | 302 | 93    | 1.03  | 1 |

|     |                              |                          |      |     |     |     |     |     |     |      |      |    |    |       |     |       |       |   |
|-----|------------------------------|--------------------------|------|-----|-----|-----|-----|-----|-----|------|------|----|----|-------|-----|-------|-------|---|
| 156 | Dayton Steel Racket Company  | New Dayton               | 1925 | 680 | 174 | 321 | 304 | 230 | 214 | 12.3 | 11.5 | 20 | 24 | 385.2 | 329 | 97    | 0.69  | 5 |
| 157 | -                            | Sport                    | 1925 | 680 | 150 | 300 | 288 | 214 | 188 | 17.7 | 16.5 | 20 | 21 | 345.3 | 345 | 94    | 1.035 | 1 |
| 158 | Allen West Company           | -                        | 1925 | 680 | 176 | 362 | 355 | 222 | 203 | 12.9 | 11.5 | 18 | 22 | 362   | 324 | 91.5  | 0.305 | 5 |
| 159 | Allen West Company           | -                        | 1925 | 680 | 180 | 362 | 355 | 222 | 204 | 12.1 | 11.4 | 18 | 22 | 363.6 | 327 | 94.5  | 0.515 | 5 |
| 160 | -                            | Sandringham              | 1925 | 685 | 234 | 298 | 284 | 228 | 202 | 18.6 | 16.3 | 20 | 23 | 357.4 | 337 | 94    | 0.825 | 1 |
| 161 | Slazenger                    | Doherty                  | 1925 | 684 | 156 | 316 | 284 | 229 | 205 | 22.0 | 17.7 | 20 | 21 | 387.7 | 329 | 99    | 0.895 | 1 |
| 162 | Dunlop                       | -                        | 1925 | 687 | 230 | 298 | 284 | 229 | 201 | 19.0 | 17.8 | 20 | 22 | 389.1 | 339 | 102   | 1.025 | 1 |
| 163 | Spalding & Bros              | Tournament               | 1925 | 690 | 210 | 308 | 294 | 224 | 193 | 20.4 | 17.4 | 20 | 20 | 376.1 | 330 | 97    | 0.795 | 1 |
| 164 | -                            | Ready                    | 1925 | 688 | 230 | 296 | 284 | 232 | 204 | 18.7 | 17.3 | 20 | 21 | 374.8 | 344 | 85    | 2.195 | 1 |
| 165 | Dayton Steel Racket Company  | Dayton                   | 1925 | 680 | 226 | 300 | 291 | 219 | 200 | 21.7 | 19.1 | 18 | 20 | 356.9 | 341 | 106   | 0.58  | 5 |
| 166 | Spalding & Bros              | The Spalding             | 1925 | 691 | 209 | 305 | 291 | 220 | 188 | 19.5 | 17.6 | 20 | 19 | 398.7 | 339 | 101.5 | 1.145 | 1 |
| 167 | Ovee                         | Titan                    | 1925 | 667 | 225 | 276 | 264 | 225 | 201 | 20.1 | 18.6 | 18 | 20 | 384.4 | 360 | 105   | 0.865 | 1 |
| 168 | Spalding & Bros              | Tournament               | 1925 | 683 | 210 | 300 | 286 | 231 | 201 | 19.8 | 17.8 | 20 | 20 | 408.3 | 332 | 90    |       | 1 |
| 169 | Birmingham Aluminium Casting | Birmal                   | 1925 | 673 | 165 | 296 | 286 | 215 | 205 | 16.3 | 13.8 | 18 | 21 | 386.5 | 335 | 80    | 0.55  | 3 |
| 170 | -                            | Unity                    | 1925 | 694 | 210 | 307 | 295 | 220 | 196 | 20.1 | 18.8 | 18 | 20 | 349.2 | 340 | 97    | 0.88  | 1 |
| 171 | Henry A. Murton              | Riseley Hexagon          | 1925 | 696 | 229 | 316 | 303 | 216 | 190 | 21.5 | 19.4 | 18 | 20 | 366.8 | 328 | 98    | 1.86  | 1 |
| 172 | Atlas & Co                   | The Imp                  | 1926 | 685 | 222 | 296 | 283 | 231 | 208 | 20.7 | 17.5 | 22 | 20 | 368.2 | 349 | 98    | 1.01  | 1 |
| 173 | Dayton Steel Racket Company  | -                        | 1927 | 686 | 295 | 374 | 365 | 230 | 212 | 12.1 | 11.6 | 18 | 25 | 366.3 | 346 | 98    | 0.235 | 5 |
| 174 | Spalding & Bros              | Top Flite                | 1927 | 690 | 178 | 313 | 276 | 219 | 193 | 24.5 | 18.6 | 18 | 19 | 374.5 | 323 | 93    | 1.055 | 1 |
| 175 | E.J. Riley                   | Regent                   | 1928 | 670 | 225 | 283 | 272 | 252 | 228 | 19.1 | 17.5 | 20 | 23 | 366.6 | 337 | 102   | 1.775 | 1 |
| 176 | Ovee                         | -                        | 1928 | 681 | 212 | 301 | 289 | 231 | 206 | 18.7 | 17.3 | 18 | 21 | 382.5 | 339 | 103   | 0.69  | 1 |
| 177 | Spalding & Bros              | Gold Medal               | 1928 | 676 | 210 | 281 | 267 | 250 | 223 | 19.0 | 17.5 | 20 | 20 | 385.8 | 321 | 88.5  | 2.305 | 1 |
| 178 | Grays                        | Max Woosnam              | 1929 | 694 | 240 | 330 | 298 | 222 | 195 | 21.6 | 16.5 | 18 | 22 | 392.9 | 347 | 96    | 1     | 1 |
| 179 | Prosser                      | Phenomenon               | 1929 | 690 | 154 | 297 | 264 | 220 | 195 | 23.0 | 17.5 | 18 | 20 | 358.7 | 332 | 106.5 | 1.045 | 1 |
| 180 | F.H. Ayres                   | Ace                      | 1930 | 689 | 224 | 317 | 287 | 218 | 190 | 21.1 | 17.7 | 20 | 21 | 358.6 | 341 | 106   | 1.2   | 1 |
| 181 | Slazenger                    | Queen's                  | 1930 | 685 | 230 | 314 | 284 | 230 | 204 | 21.9 | 16.6 | 20 | 22 | 373.5 | 337 | 99    | 0.925 | 1 |
| 182 | -                            | -                        | 1930 | 690 | 185 | 312 | 290 | 226 | 196 | 19.7 | 16.7 | 20 | 22 | 322.9 | 332 | 97.5  | 0.745 | 1 |
| 183 | N.J. Magnan Corporation      | Tournament               | 1930 | 670 | 160 | 296 | 268 | 228 | 202 | 22.5 | 17.7 | 18 | 21 | 358.2 | 330 | 100   | 1.11  | 1 |
| 184 | Jeffries                     | Gold Medal Ruby          | 1930 | 687 | 250 | 303 | 290 | 230 | 202 | 21.4 | 17.8 | 20 | 20 | 377.6 | 359 | 107.5 | 1.285 | 1 |
| 185 | Dayton Steel Racket Company  | -                        | 1930 | 691 | 177 | 388 | 369 | 224 | 208 | 12.5 | 11.7 | 18 | 25 | 366   | 342 | 98.5  | 0.375 | 5 |
| 186 | Slazenger                    | Queen's Tournament Model | 1930 | 688 | 160 | 312 | 280 | 218 | 192 | 21.5 | 17.7 | 20 | 22 | 371.2 | 340 | 98    | 0.885 | 1 |
| 187 | F.H. Ayres                   | Gold Medal               | 1930 | 686 | 160 | 320 | 285 | 228 | 203 | 20.2 | 18.1 | 20 | 21 | 366   | 333 | 106   | 0.67  | 1 |
| 188 | Slazenger                    | La Belle                 | 1930 | 686 | 259 | 296 | 282 | 229 | 204 | 19.1 | 17.7 | 20 | 22 | 356.4 | 342 | 89.5  | 2.965 | 1 |
| 189 | -                            | Imperial                 | 1930 | 681 | 222 | 296 | 282 | 234 | 204 | 18.8 | 16.8 | 20 | 22 | 391.7 | 318 | 96    | 0.86  | 1 |
| 190 | Accles & Pollock             | -                        | 1930 | 687 | 149 | 311 | 284 | 225 | 206 | 11.3 | 10.2 | 20 | 23 | 411.5 | 328 | 79    | 0.225 | 2 |
| 191 | Slazenger                    | Tournament               | 1930 | 692 | 173 | 313 | 283 | 215 | 191 | 22.6 | 18.6 | 20 | 22 | 399.8 | 337 | 94    | 1.45  | 1 |
| 192 | Slazenger                    | Queen's Tournament Model | 1930 | 676 | 214 | 305 | 275 | 243 | 220 | 22.0 | 17.7 | 20 | 22 | 387.4 | 347 | 100.5 | 0.8   | 1 |

|     |                             |                          |      |     |     |     |     |     |     |      |      |    |    |       |     |       |       |   |
|-----|-----------------------------|--------------------------|------|-----|-----|-----|-----|-----|-----|------|------|----|----|-------|-----|-------|-------|---|
| 193 | -                           | Premier                  | 1930 | 682 | 207 | 306 | 293 | 225 | 197 | 18.1 | 16.5 | 20 | 19 | 370.3 | 340 | 89    | 1.055 | 1 |
| 194 | F.H. Ayres                  | Davis Cup                | 1932 | 688 | 150 | 321 | 284 | 230 | 204 | 22.0 | 18.4 | 20 | 21 | 402.2 | 334 | 107   |       | 1 |
| 195 | F.H. Ayres                  | Club Improved            | 1932 | 684 | 230 | 302 | 283 | 230 | 204 | 17.1 | 16.7 | 20 | 21 | 355.4 | 346 | 90    | 0.95  | 1 |
| 196 | Prosser & Sons              | Mead Marvel              | 1932 | 681 | 230 | 298 | 286 | 234 | 210 | 21.2 | 16.5 | 20 | 22 | 372.4 | 320 | 95    | 1.16  | 1 |
| 197 | F.H. Ayres                  | Challenge                | 1932 | 681 | 216 | 299 | 287 | 229 | 203 | 21.5 | 18.5 | 18 | 22 | 375.5 | 333 | 96    | 1.305 | 1 |
| 198 | F.H. Ayres                  | The New Wimbledon        | 1932 | 686 | 166 | 306 | 273 | 225 | 202 | 20.5 | 18.0 | 20 | 19 | 343.2 | 335 | 101   | 0.83  | 1 |
| 199 | Dunlop                      | Maxply                   | 1932 | 688 | 174 | 312 | 278 | 228 | 202 | 21.7 | 17.2 | 20 | 22 | 388.2 | 330 | 108   | 0.98  | 1 |
| 200 | F.H. Ayres                  | The New International    | 1932 | 681 | 228 | 315 | 277 | 232 | 208 | 22.0 | 16.9 | 20 | 20 | 354.3 | 329 | 106.5 | 0.725 | 1 |
| 201 | F.H. Ayres                  | The New Wimbledon        | 1932 | 687 | 164 | 315 | 280 | 235 | 210 | 21.2 | 16.8 | 20 | 21 | 386.8 | 330 | 101   | 0.95  | 1 |
| 202 | Slazenger                   | Queen's                  | 1932 | 686 | 171 | 304 | 272 | 220 | 196 | 27.0 | 17.0 | 18 | 20 | 385   | 324 | 99    | 1.18  | 1 |
| 203 | Alexander of Launceston     | Cressy Wizard            | 1933 | 670 | 174 | 297 | 255 | 216 | 188 | 20.8 | 19.6 | 20 | 23 | 387.2 | 342 | 119   | 0.81  | 1 |
| 204 | F.H. Ayres                  | Club Improved            | 1933 | 681 | 220 | 295 | 281 | 237 | 209 | 18.4 | 16.0 | 20 | 21 | 367   | 338 | 93.5  | 0.975 | 1 |
| 205 | F.H. Ayres                  | Tournament Davis Cup     | 1933 | 681 | 155 | 318 | 284 | 232 | 204 | 21.4 | 16.7 | 20 | 21 | 369   | 311 | 99    | 0.775 | 1 |
| 206 | Wisden                      | Valkyrie                 | 1934 | 676 | 158 | 303 | 267 | 230 | 204 | 22.5 | 16.6 | 20 | 22 | 384.1 | 343 | 103   | 0.965 | 1 |
| 207 | Hazell                      | Streamline White Star    | 1935 | 680 | 165 | 284 | 273 | 226 | 201 | 18.5 | 16.9 | 20 | 22 | 371.7 | 320 | 109   | 0.795 | 1 |
| 208 | Hazell                      | Streamline Blue Star     | 1935 | 677 | 164 | 284 | 271 | 228 | 204 | 19.3 | 18.5 | 20 | 22 | 375   | 312 | 113.5 | 0.775 | 1 |
| 209 | Hazell                      | Streamline Red Star      | 1935 | 678 | 160 | 290 | 276 | 220 | 197 | 17.6 | 16.8 | 22 | 24 | 369.4 | 310 | 99.5  | 0.83  | 1 |
| 210 | Hazell                      | Streamline Green Star    | 1935 | 688 | 170 | 292 | 281 | 220 | 193 | 18.5 | 18.2 | 20 | 22 | 370.7 | 330 | 110   | 0.925 | 1 |
| 211 | Dayton Steel Racket Company | -                        | 1935 | 677 | 164 | 345 | 330 | 220 | 203 | 15.0 | 14.2 | 18 | 21 | 374.9 | 326 | 117   | 0.415 | 5 |
| 212 | -                           | Pall Mall                | 1935 | 688 | 220 | 316 | 288 | 226 | 202 | 23.0 | 19.5 | 20 | 21 | 361.5 | 346 | 107   | 1.53  | 1 |
| 213 | -                           | Fulcrum                  | 1935 | 684 | 160 | 308 | 274 | 230 | 205 | 22.5 | 16.5 | 20 | 20 | 366.2 | 332 | 97    | 0.835 | 1 |
| 214 | Muller                      | Dimid                    | 1935 | 688 | 170 | 294 | 280 | 224 | 198 | 21.2 | 16.2 | 24 | 24 | 337   | 339 | 105   | 0.495 | 1 |
| 215 | Empire Racket Company       | Telopea                  | 1935 | 677 | 160 | 298 | 264 | 220 | 194 | 23.9 | 18.0 | 20 | 19 | 371   | 338 | 118.5 | 1.23  | 1 |
| 216 | Empire Racket Company       | Aristocrat Model de Luxe | 1935 | 681 | 178 | 307 | 267 | 228 | 203 | 23.0 | 19.0 | 20 | 21 | 358.3 | 348 | 110   | 0.995 | 1 |
| 217 | F.H. Ayres                  | Davis Cup Model C        | 1935 | 685 | 150 | 309 | 275 | 219 | 194 | 24.0 | 19.1 | 20 | 20 | 383.6 | 344 | 110   | 1.025 | 1 |
| 218 | Lockwood Brown              | -                        | 1935 | 676 | 178 | 294 | 282 | 226 | 201 | 22.8 | 16.6 | 20 | 21 | 376   | 323 | 102.5 | 0.985 | 1 |
| 219 | -                           | -                        | 1935 | 655 | 170 | 298 | 266 | 217 | 196 | 21.2 | 17.0 | 20 | 18 | 317.2 | 339 | 111   | 0.88  | 1 |
| 220 | Maxima                      | Ardita                   | 1935 | 688 | 168 | 307 | 275 | 228 | 204 | 22.7 | 18.1 | 20 | 21 | 385.1 | 322 | 105   | 0.73  | 1 |
| 221 | Slazenger                   | Queen's Tournament Model | 1935 | 692 | 170 | 315 | 280 | 212 | 188 | 23.5 | 18.3 | 20 | 22 | 378.3 | 346 | 108   | 1.2   | 1 |
| 222 | -                           | Premier                  | 1935 | 678 | 228 | 298 | 287 | 230 | 205 | 19.8 | 17.8 | 20 | 21 | 356.6 | 334 | 96    | 0.87  | 1 |
| 223 | W.H. James                  | Classic                  | 1935 | 682 | 190 | 318 | 282 | 220 | 195 | 23.1 | 16.7 | 20 | 21 | 377.7 | 331 | 89    | 1.215 | 1 |
| 224 | Slazenger                   | Queen's Tournament Model | 1935 | 687 | 175 | 320 | 285 | 227 | 203 | 21.0 | 17.0 | 20 | 22 | 351.2 | 325 | 82    | 1.68  | 1 |
| 225 | Slazenger                   | Player                   | 1935 | 685 | 242 | 300 | 285 | 226 | 200 | 18.8 | 17.3 | 20 | 22 | 372.6 | 345 | 101   | 0.905 | 1 |
| 226 | Spalding & Bros             | Exmoor                   | 1935 | 685 | 212 | 300 | 286 | 234 | 204 | 19.4 | 18.2 | 20 | 20 | 389.9 | 352 | 95    | 1.675 | 1 |
| 227 | -                           | Red Star                 | 1935 | 686 | 180 | 287 | 269 | 230 | 204 | 20.0 | 18.1 | 20 | 22 | 379.2 | 337 | 97    | 0.83  | 1 |
| 228 | Lillywhite Frowd            | Vitesse                  | 1935 | 686 | 162 | 302 | 268 | 220 | 198 | 21.1 | 17.1 | 18 | 20 | 359.9 | 339 | 103   | 1.01  | 1 |
| 229 | -                           | Ace                      | 1935 | 677 | 158 | 312 | 276 | 235 | 209 | 20.3 | 17.5 | 20 | 21 | 380.7 | 300 | 88    | 0.88  | 1 |
| 230 | F.H. Ayres                  | The New Wimbledon        | 1935 | 687 | 154 | 317 | 283 | 230 | 205 | 21.8 | 17.6 | 20 | 21 | 379.8 | 331 | 101.5 | 0.8   | 1 |
| 231 | Spalding & Bros             | Top Flite                | 1935 | 684 | 166 | 295 | 265 | 221 | 198 | 24.0 | 19.0 | 20 | 19 | 373.8 | 336 | 111   | 0.945 | 1 |
| 232 | Gardner Bors                | Green Dragon Fly         | 1936 | 683 | 224 | 301 | 289 | 228 | 204 | 22.5 | 19.5 | 20 | 21 | 371.1 | 345 | 99    | 0.89  | 1 |
| 233 | Slazenger                   | Victory                  | 1937 | 677 | 164 | 302 | 270 | 228 | 204 | 22.0 | 18.7 | 20 | 20 | 356.5 | 325 | 106   | 0.945 | 1 |

|     |                             |                                     |      |     |     |     |     |     |     |      |      |    |    |       |     |       |       |   |
|-----|-----------------------------|-------------------------------------|------|-----|-----|-----|-----|-----|-----|------|------|----|----|-------|-----|-------|-------|---|
| 234 | F.H. Ayres                  | Coronation Model A                  | 1937 | 688 | 218 | 319 | 284 | 235 | 210 | 20.8 | 17.6 | 20 | 21 | 383.7 | 335 | 99    | 0.86  | 1 |
| 235 | -                           | Top Flite (Reproduction)            | 1938 | 684 | 230 | 320 | 288 | 230 | 204 | 18.5 | 17.0 | 18 | 20 | 337   | 341 | 88.5  |       | 1 |
| 236 | Wisden                      | Cosmos                              | 1938 | 681 | 206 | 315 | 281 | 228 | 202 | 20.5 | 17.1 | 18 | 20 | 364.7 | 320 | 99    | 0.875 | 1 |
| 237 | Baily & Co                  | Hardcourt Conquest                  | 1938 | 671 | 168 | 306 | 273 | 226 | 204 | 22.8 | 17.6 | 20 | 21 | 351   | 326 | 102   | 0.98  | 1 |
| 238 | Slazenger                   | Queen's                             | 1938 | 686 | 171 | 314 | 278 | 224 | 200 | 22.6 | 17.2 | 20 | 23 | 389.8 | 355 | 108   | 0.82  | 1 |
| 239 | Slazenger                   | Eclipse                             | 1938 | 694 | 148 | 326 | 292 | 222 | 197 | 22.1 | 18.6 | 20 | 23 | 392.6 | 326 | 73.5  | 5.89  | 1 |
| 240 | Spalding & Bros             | Masterblit                          | 1939 | 687 | 180 | 297 | 265 | 220 | 194 | 27.0 | 18.6 | 18 | 19 | 392.1 | 327 | 108   | 1.64  | 1 |
| 241 | Spalding & Bros             | Masterblit                          | 1939 | 684 | 156 | 306 | 276 | 222 | 200 | 24.5 | 17.5 | 18 | 20 | 382.9 | 311 | 89    | 1.45  | 1 |
| 242 | Darsonval                   | Darsonval                           | 1940 | 692 | 190 | 311 | 286 | 219 | 189 | 24.1 | 18.1 | 20 | 22 | 377.8 | 334 | 110   | 0.755 | 1 |
| 243 | Spalding & Bros             | Record                              | 1940 | 687 | 165 | 300 | 267 | 218 | 194 | 23.0 | 17.5 | 20 | 20 | 361.8 | 326 | 102.5 | 1.44  | 1 |
| 244 | Maxima                      | Torneo                              | 1940 | 685 | 160 | 305 | 275 | 227 | 206 | 23.1 | 17.8 | 20 | 21 | 378.1 | 333 | 109   | 0.645 | 1 |
| 245 | Spalding & Bros             | Top Flite, Davis Cup, Ladies' Model | 1940 | 674 | 162 | 293 | 261 | 222 | 198 | 24.0 | 17.5 | 18 | 19 | 359.7 | 332 | 102   | 0.89  | 1 |
| 246 | Dayton Steel Racket Company | -                                   | 1940 | 680 | 155 | 296 | 274 | 223 | 201 | 14.2 | 13.8 | 18 | 20 | 385.2 | 335 | 109   | 0.905 | 5 |
| 247 | Spalding & Bros             | Masterblit                          | 1940 | 682 | 157 | 309 | 274 | 226 | 201 | 21.8 | 18.2 | 20 | 22 | 375.4 | 329 | 97.5  | 1.32  | 1 |
| 248 | Dunlop                      | Maxply, Fort                        | 1940 | 688 | 168 | 318 | 273 | 226 | 205 | 24.0 | 17.0 | 18 | 20 | 366   | 338 | 100   | 0.845 | 1 |
| 249 | Wilson                      | Ellsworth Vines International       | 1941 | 688 | 158 | 308 | 274 | 230 | 203 | 20.8 | 16.9 | 18 | 21 | 379.5 | 319 | 116.5 | 1.18  | 1 |
| 250 | Wilson                      | Mary Hardwick Finalist              | 1942 | 687 | 150 | 307 | 275 | 227 | 200 | 21.7 | 17.0 | 18 | 22 | 359.7 | 336 | 106   | 0.645 | 1 |
| 251 | Wilson                      | Ellsworth Vines Scholastic          | 1943 | 688 | 159 | 316 | 276 | 230 | 200 | 18.0 | 17.7 | 16 | 18 | 352.5 | 336 | 107   | 0.695 | 1 |
| 252 | Dunlop                      | Alpha                               | 1945 | 682 | 163 | 308 | 274 | 230 | 204 | 18.4 | 17.8 | 20 | 20 | 356   | 314 | 91    | 0.79  | 1 |
| 253 | Dunlop                      | Maxply                              | 1945 | 686 | 161 | 309 | 275 | 228 | 204 | 21.3 | 17.1 | 20 | 21 | 371.1 | 333 | 105   | 1     | 1 |
| 254 | Dunlop                      | MaxPly Light                        | 1945 | 689 | 159 | 308 | 280 | 224 | 198 | 25.0 | 17.0 | 20 | 21 | 361   | 321 | 97.5  | 1.14  | 1 |
| 255 | Dunlop                      | Maxply                              | 1946 | 682 | 164 | 307 | 275 | 228 | 205 | 22.9 | 16.4 | 20 | 21 | 384.4 | 323 | 91    | 0.955 | 1 |
| 256 | Muller                      | Dimid                               | 1948 | 683 | 158 | 311 | 276 | 234 | 204 | 23.0 | 16.5 | 22 | 22 | 374.7 | 326 | 94    | 0.83  | 1 |
| 257 | Samuel Fox & Co             | Silver Fox                          | 1950 | 686 | 164 | 287 | 274 | 210 | 200 | 17.8 | 17.8 | 20 | 20 | 366.4 | 338 | 85    | 0.32  | 5 |
| 258 | Slazenger                   | -                                   | 1950 | 688 | 168 | 317 | 283 | 225 | 200 | 23.4 | 18.1 | 20 | 22 | 392.1 | 329 | 104   | 0.85  | 1 |
| 259 | Corrass                     | -                                   | 1950 | 678 | 155 | 297 | 265 | 224 | 203 | 20.8 | 18.6 | 18 | 18 | 394.3 | 323 | 115.5 | 0.775 | 1 |
| 260 | -                           | Conquest                            | 1950 | 676 | 153 | 302 | 271 | 230 | 207 | 23.8 | 17.4 | 20 | 21 | 352.1 | 328 | 101   | 1.01  | 1 |
| 261 | -                           | Conquest                            | 1950 | 679 | 153 | 304 | 275 | 228 | 204 | 23.8 | 16.8 | 20 | 21 | 354.5 | 306 | 96    | 0.9   | 1 |
| 262 | Slazenger                   | Meteor                              | 1950 | 690 | 169 | 308 | 285 | 223 | 187 | 22.4 | 17.4 | 20 | 22 | 389.3 | 331 | 90.5  | 1.065 | 1 |
| 263 | Slazenger                   | The Slazenger                       | 1950 | 685 | 163 | 330 | 270 | 219 | 197 | 22.5 | 17.7 | 18 | 20 | 373.9 | 314 | 92    | 1.25  | 1 |
| 264 | Slazenger                   | PM                                  | 1950 | 685 | 169 | 305 | 269 | 222 | 199 | 20.5 | 17.4 | 20 | 19 | 332.3 | 342 | 104   | 0.95  | 1 |
| 265 | Grays                       | Double Blue                         | 1950 | 681 | 154 | 302 | 271 | 222 | 198 | 18.2 | 15.2 | 18 | 21 | 333.5 | 333 | 103.5 | 1.31  | 1 |
| 266 | Slazenger                   | Demon                               | 1950 | 686 | 168 | 304 | 269 | 225 | 202 | 21.5 | 17.5 | 18 | 19 | 374.3 | 326 | 106   | 0.84  | 1 |
| 267 | Dunlop                      | Maxply                              | 1951 | 683 | 173 | 303 | 271 | 230 | 206 | 20.1 | 16.6 | 18 | 20 | 394.7 | 324 | 109   | 0.815 | 1 |
| 268 | G.H. Cleave                 | Whipshaft                           | 1951 | 674 | 150 | 296 | 260 | 228 | 204 | 22.6 | 17.5 | 18 | 19 | 404.9 | 325 | 107.5 | 0.995 | 1 |
| 269 | Dunlop                      | Frank Sedgman Maxply                | 1952 | 681 | 160 | 296 | 264 | 232 | 204 | 21.0 | 18.6 | 18 | 18 | 407.4 | 340 | 107   | 0.94  | 1 |
| 270 | Wilson                      | Mary Hardwick Personal              | 1952 | 685 | 156 | 307 | 273 | 229 | 202 | 21.8 | 17.3 | 18 | 20 | 412.3 | 334 | 109   | 0.945 | 1 |
| 271 | Slazenger                   | Demon                               | 1953 | 686 | 178 | 298 | 266 | 218 | 193 | 21.4 | 17.4 | 18 | 20 | 358.3 | 342 | 123   | 0.935 | 1 |
| 272 | Slazenger                   | IC                                  | 1953 | 691 | 168 | 307 | 275 | 214 | 190 | 22.8 | 17.2 | 18 | 20 | 383   | 324 | 102   | 0.905 | 1 |
| 273 | Slazenger                   | IC                                  | 1953 | 687 | 161 | 303 | 269 | 223 | 198 | 22.2 | 16.5 | 18 | 20 | 399.6 | 324 | 109   | 0.885 | 1 |

|     |                                |                                   |      |     |     |     |     |     |     |      |      |    |    |       |     |       |       |   |
|-----|--------------------------------|-----------------------------------|------|-----|-----|-----|-----|-----|-----|------|------|----|----|-------|-----|-------|-------|---|
| 274 | Dunlop                         | Pioneer                           | 1954 | 680 | 159 | 285 | 271 | 232 | 208 | 17.9 | 17.8 | 18 | 20 | 384.1 | 298 | 91    | 0.94  | 1 |
| 275 | W.H. James                     | Aero Ace                          | 1954 | 686 | 149 | 313 | 279 | 225 | 200 | 22.7 | 17.8 | 18 | 20 | 384.5 | 329 | 100   | 1.095 | 1 |
| 276 | Lillywhite Frowd               | -                                 | 1954 | 681 | 151 | 300 | 265 | 218 | 195 | 20.6 | 18.0 | 18 | 20 | 361.7 | 331 | 114   | 0.945 | 1 |
| 277 | Dunlop                         | Maxply                            | 1955 | 684 | 160 | 308 | 275 | 230 | 205 | 21.0 | 16.8 | 18 | 20 | 363   | 334 | 106   | 1.015 | 1 |
| 278 | Prosser                        | Super Phenomenon                  | 1955 | 690 | 151 | 310 | 280 | 220 | 197 | 22.4 | 17.2 | 18 | 20 | 381.8 | 323 | 100   | 0.975 | 1 |
| 279 | Prosser                        | Super Phenomenon                  | 1955 | 686 | 153 | 307 | 271 | 225 | 203 | 23.3 | 17.6 | 18 | 20 | 378.2 | 317 | 84    | 1.24  | 1 |
| 280 | Slazenger                      | PM                                | 1955 | 685 | 160 | 310 | 278 | 224 | 201 | 22.1 | 16.9 | 20 | 19 | 373   | 332 | 93.5  | 1.085 | 1 |
| 281 | Dunlop                         | Maxply                            | 1955 | 688 | 151 | 311 | 277 | 228 | 204 | 20.7 | 16.0 | 18 | 20 | 382.9 | 324 | 102.5 | 0.86  | 1 |
| 282 | Slazenger                      | Demon                             | 1955 | 684 | 170 | 300 | 267 | 229 | 203 | 23.0 | 17.8 | 18 | 19 | 387.5 | 339 | 112   | 0.915 | 1 |
| 283 | Slazenger                      | PM                                | 1955 | 687 | 170 | 330 | 273 | 218 | 195 | 23.0 | 16.1 | 20 | 19 | 352.4 | 337 | 104   | 1.5   | 1 |
| 284 | F.H. Ayres                     | -                                 | 1955 | 687 | 172 | 305 | 270 | 225 | 201 | 22.5 | 18.0 | 18 | 19 | 379.6 | 343 | 106.5 | 0.91  | 1 |
| 285 | Jacques                        | All England                       | 1955 | 692 | 160 | 298 | 268 | 216 | 192 | 23.2 | 17.8 | 18 | 20 | 359.7 | 355 | 110   | 0.96  | 1 |
| 286 | Prosser                        | Super Phenomenon                  | 1955 | 688 | 152 | 310 | 280 | 220 | 198 | 22.4 | 18.0 | 18 | 20 | 399.5 | 316 | 101.5 | 0.99  | 1 |
| 287 | Samuel Fox and Co.             | Silver Fox                        | 1955 | 685 | 162 | 278 | 265 | 214 | 200 | 18.0 | 17.7 | 20 | 20 | 360.4 | 328 | 109   | 0.495 | 5 |
| 288 | Cochet Sports Company          | Coupe Davis Brevetée              | 1955 | 680 | 152 | 302 | 265 | 224 | 199 | 19.5 | 16.5 | 18 | 20 | 364.2 | 342 | 105.5 | 0.95  | 1 |
| 289 | Government Sports Good Factory | Aeroplane                         | 1955 | 686 | 174 | 308 | 274 | 226 | 203 | 21.9 | 17.0 | 18 | 20 | 359.5 | 338 | 118   | 0.84  | 1 |
| 290 | -                              | Olympic                           | 1956 | 682 | 152 | 306 | 274 | 227 | 200 | 23.2 | 18.3 | 18 | 21 | 403.1 | 326 | 115.5 | 0.82  | 1 |
| 291 | Grays                          | New Blue                          | 1956 | 688 | 171 | 290 | 278 | 228 | 204 | 26.0 | 17.0 | 20 | 20 | 358.8 | 343 | 129   | 0.85  | 1 |
| 292 | G.H. Cleave                    | Whipshaft County Model            | 1957 | 678 | 187 | 305 | 271 | 218 | 194 | 22.4 | 17.9 | 18 | 19 | 397.7 | 327 | 107.5 | 0.965 | 1 |
| 293 | Dunlop                         | Maxply                            | 1958 | 683 | 145 | 308 | 271 | 230 | 205 | 21.0 | 16.8 | 18 | 20 | 373.8 | 347 | 110   | 0.975 | 1 |
| 294 | Dunlop                         | Match Point                       | 1959 | 681 | 159 | 301 | 268 | 232 | 208 | 21.0 | 16.7 | 18 | 20 | 353.5 | 339 | 110   | 1.095 | 1 |
| 295 | -                              | Paramount                         | 1959 | 684 | 171 | 296 | 283 | 229 | 203 | 20.6 | 18.8 | 18 | 20 | 335.7 | 343 | 86    | 2.56  | 1 |
| 296 | Spalding and Bros              | -                                 | 1960 | 687 | 155 | 304 | 270 | 228 | 203 | 23.0 | 16.2 | 18 | 20 | 386   | 337 | 103   | 1.06  | 1 |
| 297 | Slazenger                      | T10 Challenge                     | 1960 | 685 | 175 | 291 | 259 | 227 | 201 | 21.6 | 17.4 | 18 | 20 | 390.2 | 336 | 100   | 1.055 | 1 |
| 298 | Dunlop                         | Match Point                       | 1960 | 685 | 162 | 306 | 273 | 227 | 205 | 21.0 | 16.8 | 18 | 20 | 385.5 | 326 | 105   | 0.95  | 1 |
| 299 | Dunlop                         | Match Point                       | 1960 | 687 | 158 | 307 | 274 | 229 | 204 | 21.2 | 16.4 | 18 | 20 | 407.3 | 312 | 102   | 0.985 | 1 |
| 300 | Wilson                         | Mary Hardwick Stylist             | 1960 | 686 | 150 | 303 | 271 | 224 | 198 | 18.6 | 16.5 | 18 | 20 | 359.7 | 336 | 110   | 0.98  | 1 |
| 301 | Slazenger                      | Demon                             | 1961 | 684 | 170 | 294 | 263 | 222 | 197 | 22.6 | 17.6 | 18 | 19 | 381.6 | 324 | 113   | 0.935 | 1 |
| 302 | Spalding and Bros              | Doris Hart Signature              | 1961 | 686 | 150 | 307 | 271 | 227 | 200 | 23.1 | 16.5 | 18 | 20 | 369.8 | 347 | 105   | 0.995 | 6 |
| 303 | Slazenger                      | Challenge Power                   | 1961 | 688 | 162 | 298 | 266 | 218 | 195 | 23.9 | 16.9 | 18 | 20 | 396.3 | 339 | 126   | 0.97  | 1 |
| 304 | Slazenger                      | Challenge Power                   | 1961 | 687 | 167 | 297 | 264 | 221 | 197 | 22.0 | 16.4 | 18 | 20 | 384.3 | 344 | 113   | 1.065 | 1 |
| 305 | Slazenger                      | Challenge P4                      | 1962 | 686 | 179 | 298 | 263 | 225 | 198 | 22.3 | 16.9 | 18 | 19 | 397.8 | 333 | 110   | 0.89  | 1 |
| 306 | Slazenger                      | PM                                | 1962 | 684 | 167 | 303 | 270 | 222 | 199 | 23.5 | 17.6 | 18 | 19 | 379.4 | 310 | 109   | 0.93  | 1 |
| 307 | Spalding                       | Dennis Ralston Signature Personal | 1963 | 690 | 159 | 311 | 266 | 220 | 196 | 22.4 | 16.3 | 18 | 20 | 359.5 | 347 | 103.5 | 0.96  | 6 |
| 308 | Dunlop                         | Alliance                          | 1964 | 689 | 161 | 305 | 268 | 226 | 198 | 24.0 | 17.0 | 18 | 21 | 361   | 354 | 105   | 0.9   | 1 |
| 309 | Grays                          | Silver Grey                       | 1964 | 683 | 141 | 274 | 262 | 222 | 197 | 22.7 | 13.7 | 18 | 19 | 352.1 | 326 | 102   | 0.705 | 1 |
| 310 | Slazenger                      | Challenge No.1                    | 1965 | 687 | 172 | 302 | 275 | 228 | 204 | 21.4 | 16.0 | 18 | 19 | 412.5 | 320 | 102   | 0.9   | 1 |
| 311 | Slazenger                      | Challenge Bi-hander               | 1965 | 685 | 194 | 303 | 272 | 226 | 207 | 22.0 | 16.1 | 18 | 20 | 357.2 | 333 | 94.5  | 1.845 | 1 |
| 312 | Slazenger                      | -                                 | 1965 | 688 | 168 | 317 | 278 | 224 | 199 | 23.1 | 17.5 | 18 | 20 | 391.6 | 322 | 97    | 1.05  | 1 |
| 313 | Slazenger                      | Challenge                         | 1965 | 686 | 160 | 307 | 277 | 220 | 206 | 28.3 | 21.1 | 18 | 20 | 406.7 | 328 | 109   | 0.915 | 1 |



|     |                             |                              |      |     |     |     |     |     |     |      |      |    |    |       |     |       |       |   |
|-----|-----------------------------|------------------------------|------|-----|-----|-----|-----|-----|-----|------|------|----|----|-------|-----|-------|-------|---|
| 314 | Slazenger                   | All White                    | 1965 | 687 | 166 | 306 | 275 | 221 | 197 | 24.6 | 17.2 | 18 | 20 | 402.6 | 331 | 115   | 1.075 | 1 |
| 315 | Dunlop                      | Maxply Fort Lew Hoad         | 1965 | 682 | 168 | 307 | 274 | 225 | 202 | 22.0 | 16.1 | 18 | 20 | 411.5 | 327 | 109   | 1     | 1 |
| 316 | T.A. Davis                  | Imperial                     | 1965 | 681 | 158 | 283 | 271 | 228 | 206 | 20.0 | 16.0 | 18 | 20 | 352.6 | 343 | 99    | 0.92  | 1 |
| 317 | Oliver Sports Goods Limited | Mal Anderson Signature Model | 1965 | 688 | 170 | 298 | 263 | 228 | 202 | 22.3 | 17.3 | 18 | 19 | 393.1 | 341 | 110.5 | 0.89  | 6 |
| 318 | Spalding and Bros           | Top Flite                    | 1965 | 688 | 162 | 300 | 264 | 224 | 200 | 23.3 | 16.6 | 18 | 19 | 381.2 | 339 | 108.5 | 1.01  | 1 |
| 319 | Slazenger                   | Special                      | 1965 | 681 | 169 | 303 | 270 | 230 | 206 | 23.5 | 17.5 | 18 | 21 | 368.3 | 343 | 111   | 1.195 | 1 |
| 320 | Lacoste                     | -                            | 1965 | 673 | 160 | 310 | 297 | 240 | 225 | 14.5 | 14.5 | 18 | 20 | 337.8 | 346 | 93    | 0.195 | 2 |
| 321 | Donnay                      | Rod Laver                    | 1965 | 680 | 170 | 310 | 270 | 230 | 210 | 0.0  | 0.0  | 18 | 20 | 372.8 | 314 | 104   | 0.96  | 1 |
| 322 | Gauthier et Fils Cie        | Jean Claude Molinari         | 1965 | 686 | 152 | 283 | 271 | 226 | 201 | 19.5 | 17.1 | 18 | 20 | 382.8 | 338 | 107   | 0.79  | 1 |
| 323 | Sydney                      | Robert Haillet               | 1966 | 681 | 160 | 310 | 268 | 231 | 207 | 22.1 | 16.3 | 18 | 20 | 378   | 324 | 106   | 0.96  | 1 |
| 324 | Wilson                      | Maureen Connelly Stylist     | 1966 | 688 | 150 | 304 | 271 | 230 | 204 | 21.5 | 16.3 | 18 | 20 | 331.5 | 347 | 100   | 0.92  | 1 |
| 325 | Wilson                      | Kramer Cup                   | 1966 | 689 | 164 | 310 | 274 | 229 | 203 | 23.0 | 16.4 | 18 | 20 | 382   | 342 | 100.5 | 0.935 | 6 |
| 326 | Donnay                      | Francoise Durr               | 1968 | 695 | 160 | 313 | 280 | 220 | 195 | 20.2 | 14.5 | 18 | 19 | 367.3 | 340 | 99.5  | 1.01  | 1 |
| 327 | Wilson                      | T2000                        | 1969 | 677 | 180 | 278 | 264 | 236 | 222 | 14.5 | 14.5 | 18 | 18 | 369.2 | 337 | 101   | 0.26  | 2 |
| 328 | Wilson                      | The Hawk                     | 1970 | 688 | 150 | 306 | 270 | 228 | 204 | 19.5 | 16.8 | 18 | 19 | 379.2 | 323 | 102   | 0.96  | 1 |
| 329 | Dunlop                      | Maxply Superlight Mid        | 1970 | 682 | 170 | 314 | 302 | 250 | 226 | 19.0 | 17.5 | 18 | 20 | 371.7 | 334 | 106   | 0.855 | 6 |
| 330 | Spalding and Bros           | Pancho Gonzales Autograph    | 1970 | 690 | 160 | 311 | 265 | 220 | 195 | 22.2 | 16.3 | 18 | 21 | 402.2 | 329 | 107.5 | 0.93  | 1 |
| 331 | Wilson                      | Stan Smith Autograph         | 1971 | 687 | 144 | 302 | 268 | 225 | 199 | 24.3 | 18.3 | 18 | 20 | 411.6 | 323 | 112   |       | 1 |
| 332 | Dunlop                      | Maxply Dunlop Fort           | 1971 | 684 | 159 | 306 | 273 | 232 | 207 | 20.8 | 16.4 | 18 | 20 | 414.4 | 334 | 109   | 1     | 1 |
| 333 | Acro Inc                    | Seamless                     | 1971 | 675 | 164 | 288 | 263 | 242 | 225 | 18.8 | 18.6 | 18 | 18 | 369.9 | 339 | 108   | 0.455 | 3 |
| 334 | -                           | -                            | 1973 | 682 | 152 | 271 | 256 | 240 | 224 | 19.0 | 18.8 | 18 | 19 | 387.8 | 320 | 113.5 | 0.23  | 3 |
| 335 | Slazenger                   | Challenge No.1               | 1973 | 688 | 165 | 312 | 270 | 225 | 210 | 21.6 | 16.8 | 18 | 20 | 394.1 | 335 | 106   | 0.975 | 1 |
| 336 | -                           | Victorious                   | 1973 | 681 | 160 | 311 | 268 | 225 | 194 | 17.3 | 16.3 | 22 | 19 | 380   | 336 | 92    | 0.915 | 1 |
| 337 | Slazenger                   | Plus                         | 1974 | 688 | 161 | 296 | 275 | 223 | 206 | 18.7 | 18.0 | 18 | 22 | 400.4 | 327 | 133   | 0.36  | 2 |
| 338 | Slazenger                   | Slazenger Plus               | 1974 | 690 | 177 | 280 | 271 | 227 | 208 | 21.0 | 15.5 | 18 | 20 | 395.6 | 357 | 123   | 0.48  | 2 |
| 339 | -                           | Haminex 6006TS               | 1974 | 688 | 162 | 280 | 270 | 232 | 212 | 18.5 | 18.2 | 18 | 18 | 384.3 | 335 | 107   | 0.73  | 2 |
| 340 | Pro Am                      | Pro Am California            | 1974 | 681 | 152 | 283 | 267 | 230 | 212 | 15.0 | 14.0 | 20 | 20 | 373.4 | 336 | 88    | 0.165 | 2 |
| 341 | Tretorn                     | -                            | 1974 | 671 | 152 | 263 | 243 | 239 | 216 | 17.1 | 14.1 | 18 | 19 | 382.2 | 349 | 81    | 0.54  | 2 |
| 342 | Head                        | -                            | 1974 | 671 | 167 | 267 | 261 | 242 | 222 | 19.4 | 19.1 | 18 | 18 | 386.3 | 327 | 112   | 0.32  | 3 |
| 343 | Slazenger                   | Phantom                      | 1974 | 687 | 186 | 304 | 283 | 226 | 204 | 16.9 | 16.8 | 18 | 20 | 409.2 | 327 | 139.5 | 0.45  | 4 |
| 344 | Dunlop                      | Evon Goolagong               | 1975 | 688 | 172 | 307 | 273 | 230 | 205 | 22.0 | 16.5 | 18 | 20 | 375.5 | 350 | 105   | 1.13  | 1 |
| 345 | Slazenger                   | Y.P.O                        | 1975 | 680 | 173 | 285 | 273 | 230 | 206 | 18.4 | 16.4 | 18 | 20 | 371.5 | 335 | 105   | 0.795 | 1 |
| 346 | Slazenger                   | Commander                    | 1975 | 688 | 159 | 307 | 274 | 227 | 203 | 21.0 | 16.2 | 18 | 20 | 392.3 | 328 | 104   | 1.02  | 1 |
| 347 | Hakrhim                     | The Rush                     | 1975 | 685 | 160 | 304 | 296 | 223 | 207 | 19.7 | 18.2 | 16 | 15 | 288.6 | 335 | 98    | 1.005 | 1 |
| 348 | -                           | -                            | 1975 | 690 | 170 | 291 | 274 | 226 | 204 | 18.8 | 17.3 | 18 | 20 | 381.9 | 314 | 112.5 |       | 4 |
| 349 | Yonex                       | T7500 YY Alumina Custom      | 1975 | 680 | 165 | 292 | 271 | 230 | 214 | 18.6 | 10.0 | 18 | 19 | 357.4 | 324 | 120   | 0.25  | 3 |
| 350 | Dunlop                      | -                            | 1975 | 690 | 169 | 280 | 271 | 230 | 210 | 21.0 | 15.5 | 18 | 20 | 406.1 | 351 | 127   | 0.395 | 2 |
| 351 | Walter Precision Italiana   | -                            | 1975 | 680 | 165 | 285 | 270 | 225 | 205 | 19.6 | 19.0 | 18 | 21 | 390.2 | 324 | 140   | 0.33  | 3 |
| 352 | Ascot                       | Pro 2070 Model Mark Cox      | 1975 | 686 | 160 | 310 | 275 | 233 | 207 | 21.8 | 16.4 | 18 | 20 | 396   | 309 | 100.5 | 0.87  | 1 |
| 353 | Gautier                     | G-01                         | 1975 | 687 | 158 | 308 | 270 | 224 | 200 | 18.4 | 16.5 | 18 | 20 | 386.9 | 334 | 108.5 | 0.865 | 6 |
| 354 | Sunn                        | -                            | 1975 | 668 | 155 | 291 | 275 | 250 | 234 | 19.0 | 19.0 | 20 | 19 | 416.9 | 330 | 85    | 0.445 | 2 |

|     |                        |                                     |      |     |     |     |     |     |     |      |      |    |    |       |     |       |       |   |
|-----|------------------------|-------------------------------------|------|-----|-----|-----|-----|-----|-----|------|------|----|----|-------|-----|-------|-------|---|
| 355 | ?                      | ?                                   | 1975 | 684 | 188 | 274 | 265 | 238 | 220 | 19.0 | 19.0 | 18 | 20 | 364   | 343 | 114   | 0.52  | 1 |
| 356 | Wilson                 | Aluminium World Class               | 1975 | 683 | 173 | 290 | 274 | 214 | 198 | 19.2 | 19.2 | 14 | 20 | 365.3 | 338 | 129   | 0.545 | 3 |
| 357 | Slazenger              | Slazeger Plus                       | 1975 | 684 | 166 | 291 | 275 | 225 | 209 | 19.3 | 19.0 | 18 | 19 | 414.1 | 328 | 139   | 0.37  | 2 |
| 358 | Head                   | Arthur Ashe Competition             | 1975 | 685 | 192 | 304 | 280 | 228 | 202 | 14.0 | 14.0 | 16 | 21 | 366   | 324 | 101   | 0.465 | 3 |
| 359 | F.J. Bancroft          | King Personal                       | 1975 | 688 | 192 | 316 | 280 | 231 | 206 | 21.2 | 15.4 | 18 | 20 | 382.7 | 338 | 108   | 0.855 | 6 |
| 360 | Acro Inc.              | Acro Adjustable                     | 1975 | 682 | 166 | 290 | 277 | 216 | 204 | 19.1 | 19.0 | 18 | 18 | 377.2 | 324 | 121.5 | 0.31  | 3 |
| 361 | Fred Perry Sports Wear | Fred Perry                          | 1975 | 686 | 160 | 308 | 273 | 230 | 206 | 19.3 | 15.4 | 18 | 21 | 362.5 | 338 | 98    | 0.98  | 1 |
| 362 | Prince                 | Classic                             | 1976 | 679 | 172 | 344 | 336 | 282 | 266 | 19.4 | 19.1 | 16 | 19 | 372.4 | 322 | 96.5  | 0.41  | 3 |
| 363 | Rossignol              | tr10                                | 1977 | 680 | 158 | 325 | 276 | 238 | 210 | 16.0 | 16.0 | 18 | 19 | 377   | 334 | 99    | 0.55  | 4 |
| 364 | Slazenger              | Challenge X10                       | 1977 | 690 | 158 | 288 | 272 | 220 | 204 | 18.6 | 18.1 | 18 | 20 | 378.2 | 333 | 139   | 0.21  | 2 |
| 365 | Dunlop                 | Dunlop International                | 1977 | 688 | 196 | 308 | 264 | 237 | 207 | 16.5 | 16.5 | 18 | 20 | 400.7 | 336 | 108   | 0.625 | 4 |
| 366 | Head                   | Vilas                               | 1978 | 687 | 207 | 307 | 280 | 225 | 201 | 18.1 | 17.2 | 18 | 19 | 395.3 | 330 | 105   | 0.69  | 1 |
| 367 | Slazenger              | All White                           | 1978 | 692 | 181 | 288 | 275 | 226 | 202 | 17.6 | 16.6 | 18 | 20 | 397.1 | 332 | 102   | 0.76  | 6 |
| 368 | Wilson                 | Chris Evert Autograph               | 1978 | 690 | 179 | 313 | 278 | 231 | 202 | 21.0 | 14.0 | 18 | 21 | 369.9 | 336 | 99    | 1.01  | 6 |
| 369 | Head                   | Drive                               | 1979 | 687 | 194 | 332 | 296 | 231 | 203 | 15.0 | 15.0 | 18 | 20 | 389   | 334 | 103   | 0.485 | 7 |
| 370 | Montana                | Powerplay 1000                      | 1979 | 682 | 160 | 320 | 275 | 232 | 206 | 20.0 | 9.0  | 16 | 21 | 397   | 334 | 103   | 0.42  | 4 |
| 371 | Donnay                 | Court One                           | 1979 | 684 | 164 | 313 | 278 | 226 | 200 | 17.5 | 16.4 | 18 | 20 | 382.1 | 314 | 94.5  | 0.905 | 1 |
| 372 | Head                   | Arthur Ashe Competition 3           | 1979 | 682 | 190 | 305 | 278 | 222 | 195 | 14.9 | 14.9 | 16 | 21 | 362.7 | 330 | 97    | 0.515 | 7 |
| 373 | Marco                  | Pierre Darmon                       | 1980 | 687 | 161 | 330 | 267 | 225 | 200 | 20.2 | 16.0 | 18 | 20 | 352.4 | 329 | 97    |       | 1 |
| 374 | Head                   | Royal                               | 1980 | 688 | 160 | 305 | 279 | 228 | 199 | 18.0 | 18.0 | 14 | 18 | 394   | 336 | 104   | 0.4   | 4 |
| 375 | Head                   | Vilas, test                         | 1980 | 688 | 161 | 306 | 279 | 225 | 204 | 17.0 | 15.0 | 18 | 19 | 390   | 325 | 107   | 0.525 | 6 |
| 376 | Kuebler                | Plus 60                             | 1980 | 671 | 186 | 451 | 413 | 282 | 263 | 19.0 | 19.0 | 22 | 21 | 362.2 | 318 | 78.5  | 0.355 | 4 |
| 377 | Fischer                | -                                   | 1980 | 685 | 221 | 350 | 332 | 225 | 197 | 20.8 | 19.4 | 16 | 21 | 385.2 | 326 | 118   | 0.4   | 4 |
| 378 | Prince                 | Woodie                              | 1980 | 682 | 180 | 354 | 325 | 272 | 249 | 17.5 | 17.2 | 16 | 21 | 385.5 | 314 | 100   | 1.105 | 6 |
| 379 | Kuebler                | Plus 60                             | 1980 | 697 | 187 | 450 | 447 | 235 | 218 | 19.0 | 19.0 | 16 | 17 | 362.2 | 324 | 108   | 0.415 | 4 |
| 380 | Weed USA               | Weed                                | 1980 | 676 | 171 | 407 | 388 | 317 | 299 | 18.0 | 17.0 | 22 | 29 | 343.5 | 322 | 112   | 0.26  | 3 |
| 381 | Kawasaki               | Wimbledon Championships Lady Racket | 1980 | 683 | 179 | 281 | 268 | 227 | 202 | 17.4 | 15.7 | 18 | 20 | 341.5 | 319 | 96    | 0.975 | 1 |
| 382 | Kunnan                 | Super Boron                         | 1981 | 683 | 181 | 382 | 353 | 296 | 273 | 18.4 | 18.1 | 16 | 19 | 326.4 | 341 | 132   | 0.4   | 4 |
| 383 | Kawasaki               | Wimbledon                           | 1981 | 682 | 158 | 305 | 268 | 228 | 201 | 21.5 | 16.0 | 18 | 20 | 368.5 | 330 | 102   | 1.045 | 1 |
| 384 | Adidas                 | Ilie Nastase                        | 1981 | 680 | 164 | 300 | 266 | 230 | 205 | 20.7 | 17.0 | 18 | 20 | 363.4 | 334 | 103   | 1.1   | 1 |
| 385 | Adidas                 | Nastase Open                        | 1981 | 682 | 171 | 301 | 269 | 225 | 201 | 22.1 | 16.1 | 18 | 20 | 372.8 | 333 | 107   | 0.975 | 1 |
| 386 | Head                   | Vector                              | 1982 | 681 | 190 | 317 | 290 | 237 | 227 | 21.0 | 20.0 | 16 | 18 | 377   | 326 | 123   | 0.275 | 3 |
| 387 | Kneissel               | Red star Pro                        | 1982 | 682 | 154 | 297 | 275 | 242 | 217 | 20.0 | 19.0 | 16 | 19 | 358   | 334 | 123   | 0.445 | 4 |
| 388 | Fischer                | Coup                                | 1982 | 685 | 193 | 343 | 318 | 244 | 224 | 19.0 | 18.0 | 16 | 21 | 370   | 327 | 113   | 0.385 | 3 |
| 389 | Slazenger              | Challenge Plus                      | 1982 | 681 | 179 | 333 | 320 | 255 | 234 | 15.8 | 15.4 | 18 | 18 | 365.7 | 322 | 112   | 0.695 | 6 |
| 390 | Dunlop                 | John McEnroe Pro                    | 1982 | 680 | 191 | 328 | 310 | 221 | 195 | 18.7 | 18.0 | 18 | 20 | 385.2 | 324 | 108   | 0.73  | 6 |
| 391 | Wison                  | Legacy                              | 1982 | 682 | 162 | 347 | 316 | 227 | 204 | 18.8 | 18.8 | 18 | 22 | 356.5 | 335 | 126   | 0.85  | 6 |
| 392 | Inter Business AG      | Myrac                               | 1982 | 672 | 156 | 350 | 335 | 260 | 236 | 22.5 | 22.0 | 20 | 20 | 385.7 | 320 | 94    | 1.355 | 2 |
| 393 | Donnay                 | AllWood, Bjorn borg                 | 1983 | 680 | 186 | 305 | 276 | 227 | 202 | 21.0 | 16.0 | 18 | 20 | 368   | 327 | 98    | 0.91  | 1 |
| 394 | Prince                 | Pro                                 | 1983 | 685 | 175 | 372 | 335 | 278 | 262 | 21.0 | 8.0  | 16 | 19 | 360   | 322 | 123.5 | 0.29  | 3 |
| 395 | HEAD                   | Director, composite                 | 1983 | 692 | 170 | 378 | 341 | 250 | 221 | 20.0 | 20.0 | 16 | 18 | 363   | 345 | 145   | 0.365 | 6 |

|     |                        |                            |      |     |     |     |     |     |     |      |      |    |    |       |     |       |       |   |
|-----|------------------------|----------------------------|------|-----|-----|-----|-----|-----|-----|------|------|----|----|-------|-----|-------|-------|---|
| 396 | Rossignol              | F200 Carbon, Mats Wilander | 1983 | 678 | 202 | 307 | 279 | 257 | 231 | 19.0 | 13.0 | 16 | 18 | 374   | 321 | 104   | 0.455 | 4 |
| 397 | Yonex                  | Carbonex 8                 | 1983 | 681 | 182 | 298 | 273 | 237 | 207 | 18.0 | 17.0 | 20 | 19 | 401   | 335 | 113   | 0.465 | 4 |
| 398 | -                      | Silver Arrow               | 1983 | 676 | 169 | 278 | 271 | 215 | 195 | 18.0 | 14.1 | 18 | 19 | 423   | 325 | 106   | 0.54  | 4 |
| 399 | Head                   | XRC                        | 1983 | 686 | 152 | 304 | 274 | 222 | 195 | 17.2 | 16.5 | 16 | 21 | 357.4 | 329 | 116   | 0.495 | 4 |
| 400 | Wilson                 | Ultra 2                    | 1983 | 683 | 170 | 332 | 310 | 242 | 214 | 20.5 | 19.0 | 16 | 18 | 359.1 | 321 | 161   | 0.54  | 4 |
| 401 | Dunlop                 | Red Diamond                | 1984 | 689 | 166 | 309 | 273 | 228 | 204 | 25.0 | 16.0 | 18 | 20 | 336   | 330 | 94.5  | 1.14  | 1 |
| 402 | Dunlop                 | XLT-15                     | 1984 | 685 | 184 | 350 | 295 | 254 | 235 | 20.0 | 10.0 | 18 | 18 | 367   | 326 | 126   | 0.3   | 4 |
| 403 | Donnay                 | Mid 15                     | 1984 | 681 | 218 | 308 | 275 | 246 | 223 | 17.0 | 16.0 | 16 | 17 | 388   | 325 | 104.5 | 0.665 | 6 |
| 404 | HEAD                   | Director                   | 1984 | 684 | 175 | 372 | 344 | 241 | 216 | 17.0 | 16.0 | 16 | 19 | 375   | 332 | 108   | 0.5   | 6 |
| 405 | Yonex                  | R22                        | 1984 | 680 | 174 | 344 | 313 | 252 | 226 | 19.0 | 18.0 | 16 | 19 | 303   | 311 | 126   | 0.325 | 4 |
| 406 | Rtime Sports Inc.      | Wimbledon Dynamic Pro      | 1984 | 683 | 181 | 372 | 328 | 270 | 250 | 18.4 | 18.1 | 16 | 19 | 314.3 | 328 | 133   | 1.87  | 4 |
| 407 | Snauwaert              | Golden Mid                 | 1984 | 682 | 171 | 323 | 301 | 232 | 222 | 18.2 | 17.5 | 18 | 18 | 370.8 | 327 | 138   | 0.49  | 4 |
| 408 | Fischer                | Superform Tuning           | 1985 | 682 | 184 | 358 | 342 | 242 | 232 | 25.7 | 19.6 | 16 | 22 | 364.1 | 310 | 129   | 0.46  | 4 |
| 409 | Dunlop                 | MAX200G, Graphil Injection | 1985 | 683 | 167 | 326 | 297 | 251 | 230 | 21.6 | 21.6 | 18 | 20 | 352.6 | 325 | 116   | 1.705 | 4 |
| 410 | Snauwaert              | graphite ergonom           | 1985 | 670 | 185 | 324 | 300 | 245 | 224 | 18.0 | 17.0 | 18 | 18 | 370   | 348 | 107.5 | 0.5   | 4 |
| 411 | Huntak                 | H-7007, Graphite Composite | 1985 | 682 | 184 | 330 | 305 | 249 | 225 | 18.0 | 17.0 | 16 | 19 | 352   | 320 | 105   | 0.375 | 4 |
| 412 | Adidas                 | Ivan Lendl                 | 1985 | 688 | 198 | 351 | 320 | 260 | 235 | 20.0 | 20.0 | 16 | 22 | 372   | 320 | 134   | 0.355 | 4 |
| 413 | ATP                    | Mid Fox, 5                 | 1985 | 690 | 203 | 324 | 304 | 250 | 230 | 24.0 | 18.0 | 18 | 15 | 357   | 331 | 172   | 0.285 | 4 |
| 414 | Techno                 | Pro, Sirius Fibergraph 3   | 1985 | 684 | 170 | 325 | 303 | 257 | 236 | 18.0 | 18.0 | 16 | 19 | 351   | 315 | 131   | 0.335 | 4 |
| 415 | Kuebler                | Resonanz R50               | 1985 | 688 | 168 | 370 | 346 | 267 | 250 | 28.0 | 27.0 | 16 | 20 | 363   | 331 | 199   | 0.435 | 4 |
| 416 | Pro Kennex             | Magnesium Ace              | 1985 | 684 | 211 | 371 | 331 | 240 | 213 | 19.6 | 19.4 | 20 | 31 | 345   | 319 | 127   | 0.795 | 2 |
| 417 | -                      | Wimbledon Special          | 1985 | 684 | 165 | 303 | 266 | 230 | 204 | 20.1 | 16.9 | 18 | 19 | 281.9 | 341 | 103.5 | 1.13  | 1 |
| 418 | Fischer                | Superform Speedmaster      | 1985 | 685 | 223 | 354 | 332 | 242 | 223 | 19.3 | 18.2 | 16 | 21 | 399.2 | 310 | 116   | 0.27  | 4 |
| 419 | Prince                 | Graphite 110               | 1985 | 686 | 179 | 362 | 336 | 278 | 256 | 19.6 | 19.1 | 16 | 19 | 357.7 | 315 | 130   | 0.4   | 4 |
| 420 | Dyna                   | The Twin                   | 1985 | 674 | 154 | 316 | 295 | 250 | 223 | 18.0 | 17.5 | 15 | 17 | 376.3 | 338 | 98    | 0.985 | 4 |
| 421 | Slazenger              | Panther Pro-Ceramic        | 1985 | 686 | 180 | 320 | 300 | 250 | 228 | 19.6 | 19.3 | 16 | 19 | 352.9 | 314 | 107.5 | 0.605 | 4 |
| 422 | Snauwaert              | Hi-Ten 50                  | 1986 | 675 | 181 | 354 | 331 | 271 | 252 | 19.9 | 19.5 | 12 | 16 | 404   | 312 | 133.5 | 0.41  | 4 |
| 423 | Spinspot               | TS-802                     | 1986 | 686 | 188 | 332 | 306 | 250 | 224 | 19.0 | 19.0 | 16 | 19 | 344   | 338 | 117   | 0.495 | 4 |
| 424 | Kuebler                | Resonanz R30               | 1986 | 685 | 163 | 340 | 319 | 253 | 232 | 28.0 | 24.0 | 16 | 19 | 359   | 332 | 220   | 0.25  | 4 |
| 425 | Mad Raq                | 3 String                   | 1986 | 677 | 185 | 388 | 312 | 260 | 244 | 17.7 | 17.0 |    |    | 355.1 | 319 | 121   | 0.52  | 4 |
| 426 | ADA Badminton & Tennis | Mid-Plus                   | 1986 | 688 | 190 | 371 | 341 | 251 | 241 | 21.5 | 20.1 | 18 | 21 | 329.8 | 321 | 127   | 0.36  | 3 |
| 427 | Bonny                  | Bergelin Long String       | 1986 | 685 | 156 | 318 | 296 | 271 | 245 | 22.6 | 20.8 | 16 | 16 | 367.6 | 324 | 137   | 0.65  | 4 |
| 428 | Wilson                 | Pro Select 1010            | 1986 | 681 | 176 | 363 | 345 | 280 | 252 | 18.5 | 17.4 | 16 | 19 | 355.7 | 309 | 101   | 0.45  | 4 |
| 429 | Donnay                 | Pro 25, Graphite Midsized  | 1987 | 686 | 192 | 323 | 299 | 252 | 238 | 17.0 | 17.0 | 16 | 19 | 359   | 325 | 128   | 0.7   | 4 |
| 430 | Wilson                 | ProStaff                   | 1988 | 685 | 192 | 330 | 305 | 251 | 221 | 17.9 | 17.3 | 16 | 18 | 360.4 | 315 | 142.5 | 1.71  | 4 |
| 431 | Wilson                 | ProStaff 6, Sampras        | 1988 | 685 | 192 | 330 | 305 | 251 | 221 | 17.9 | 17.3 | 16 | 18 | 381.1 | 328 | 138.5 | 1.84  | 4 |
| 432 | Mad Raq                | -                          | 1988 | 679 | 185 | 358 | 344 | 276 | 261 | 23.9 | 20.6 |    |    | 328.5 | 340 | 144   | 2.235 | 4 |
| 433 | Chris New Tech Sport   | Chris CTE 5 Star Power     | 1988 | 685 | 189 | 348 | 315 | 252 | 221 | 17.0 | 15.5 | 16 | 19 | 350.7 | 315 | 150   | 0.315 | 4 |
| 434 | Pirelli & Co.          | Pirelli Technort Stratos   | 1988 | 673 | 180 | 341 | 314 | 280 | 258 | 27.5 | 22.0 | 16 | 19 | 459   | 298 | 115   | 1.955 | 4 |
| 435 | Dunlop                 | max 300i                   | 1989 | 686 | 168 | 328 | 301 | 250 | 224 | 22.0 | 14.0 | 18 | 20 | 357   | 322 | 115   | 1.6   | 4 |
| 436 | Yonex                  | R-27                       | 1989 | 681 | 195 | 344 | 313 | 240 | 220 | 18.6 | 18.1 | 16 | 19 | 370.2 | 318 | 135   | 0.365 | 4 |
| 437 | Grays of Cambridge     | (Blurred)                  | 1990 | 687 | 243 | 288 | 273 | 224 | 195 | 23.1 | 23.0 | 18 | 21 | 404.1 | 339 | 107.5 | 0.735 | 1 |

|     |                      |                                     |      |     |     |     |     |     |     |      |      |    |    |       |     |       |       |   |
|-----|----------------------|-------------------------------------|------|-----|-----|-----|-----|-----|-----|------|------|----|----|-------|-----|-------|-------|---|
| 438 | Prince               | Spectrum Comp                       | 1990 | 681 | 191 | 333 | 326 | 282 | 254 | 19.6 | 19.6 | 18 | 20 | 343.7 | 319 | 127   | 0.345 | 4 |
| 439 | Dynaspot Corporation | Dynaspot                            | 1990 | 682 | 197 | 330 | 300 | 260 | 232 | 20.3 | 19.6 | 14 | 18 | 338   | 321 | 119   | 0.605 | 4 |
| 440 | Kuebler              | Original Widebody 280 Hz            | 1991 | 685 | 165 | 361 | 347 | 264 | 247 | 33.0 | 23.0 | 18 | 21 | 354   | 317 | 242   | 0.255 | 4 |
| 441 | Kuebler              | Original Wideboy, Easy Play Comfort | 1991 | 705 | 182 | 380 | 361 | 277 | 261 | 29.0 | 20.0 | 18 | 20 | 302   | 371 | 163   | 0.395 | 4 |
| 442 | Wilson               | staff 250 st graphite               | 1991 | 685 | 189 | 344 | 322 | 262 | 234 | 25.0 | 20.0 | 16 | 18 | 329   | 328 | 137.5 | 0.425 | 4 |
| 443 | Wilson               | Wilson Pro Staff Classic            | 1991 | 681 | 166 | 334 | 321 | 255 | 234 | 22.5 | 22.5 | 18 | 20 | 361.9 | 309 | 143   | 0.64  | 4 |
| 444 | Head                 | Genesis Lady                        | 1992 | 680 | 174 | 398 | 372 | 273 | 242 | 24.0 | 23.0 | 16 | 19 | 276   | 375 | 167   | 0.31  | 4 |
| 445 | Prince               | Synergy Extender                    | 1992 | 685 | 184 | 405 | 378 | 283 | 260 | 34.0 | 26.0 | 16 | 21 | 297   | 367 | 169   | 0.55  | 4 |
| 446 | Head                 | 720 Graphite Director               | 1993 | 683 | 202 | 373 | 353 | 278 | 256 | 26.0 | 21.0 | 18 | 19 | 338   | 330 | 128   | 0.39  | 4 |
| 447 | Prince               | Mono                                | 1993 | 688 | 180 | 360 | 328 | 270 | 245 | 23.0 | 22.0 | 16 | 21 | 328   | 304 | 152.5 | 3.815 | 4 |
| 448 | Life Sport           | Magic Sport, Vabrieflex             | 1993 | 686 | 184 | 324 | 300 | 256 | 224 | 22.0 | 14.0 | 16 | 18 | 357   | 328 | 153   | 0.39  | 4 |
| 449 | Wilson               | Hammer 2.7                          | 1993 | 683 | 167 | 368 | 345 | 283 | 260 | 37.0 | 28.0 | 18 | 20 | 279   | 380 | 208   | 0.525 | 4 |
| 450 | Wilson               | Sledgehamer (Blurred)               | 1993 | 685 | 190 | 348 | 323 | 265 | 242 | 14.7 | 14.7 | 16 | 20 | 301.7 | 367 | 137   | 1.01  | 4 |
| 451 | Prince               | Extender                            | 1994 | 686 | 183 | 401 | 382 | 274 | 262 | 26.1 | 26.1 | 16 | 21 | 285.7 | 364 | 180   | 0.43  | 4 |
| 452 | Head                 | Volcano                             | 1995 | 685 | 175 | 360 | 340 | 260 | 240 | 24.0 | 22.0 | 16 | 19 | 356   | 340 | 102   | 0.515 | 4 |
| 453 | Dunlop               | Enforcer MAX                        | 1995 | 722 | 211 | 382 | 361 | 275 | 255 | 27.0 | 21.0 | 16 | 20 | 279   | 390 | 162   | 0.355 | 4 |
| 454 | Pottak               | 33.0                                | 1995 | 694 | 185 | 374 | 353 | 263 | 241 | 26.0 | 21.0 | 16 | 20 | 266   | 364 | 184   | 0.515 | 4 |
| 455 | Wilson               | Sting 2                             | 1995 | 681 | 185 | 319 | 311 | 251 | 223 | 16.8 | 16.8 | 16 | 18 | 361.6 | 328 | 123   | 0.835 | 4 |
| 456 | Head                 | Legend, Ovesize XL                  | 1996 | 710 | 215 | 372 | 350 | 263 | 240 | 24.0 | 24.0 | 16 | 19 | 286   | 350 | 138.5 | 0.415 | 4 |
| 457 | Head                 | Pure Competition, Twin Tube         | 1996 | 694 | 192 | 367 | 340 | 275 | 245 | 21.0 | 21.0 | 18 | 19 | 333   | 330 | 141   | 0.315 | 4 |
| 458 | Prince               | Micahel Chang, Graphite             | 1996 | 714 | 210 | 366 | 339 | 284 | 260 | 21.0 | 20.0 | 16 | 19 | 305   | 345 | 130   | 0.36  | 4 |
| 459 | Head                 | Ti.S7, Titanium Tennis              | 1997 | 714 | 209 | 493 | 455 | 276 | 246 | 30.0 | 27.0 | 16 | 20 | 255   | 380 | 195   | 0.615 | 4 |
| 460 | Head                 | Ti.S6                               | 1997 | 705 | 201 | 393 | 368 | 281 | 251 | 29.0 | 20.0 | 16 | 19 | 247   | 387 | 176   | 0.49  | 4 |
| 461 | Slazenger            | Classic 27                          | 1997 | 685 | 207 | 347 | 326 | 267 | 247 | 26.0 | 16.0 | 16 | 18 | 307   | 331 | 121   | 0.315 | 4 |
| 462 | Blackburne           | Blackburne DS 107                   | 1997 | 682 | 190 | 360 | 341 | 281 | 266 | 25.4 | 25.4 | 16 | 20 | 301.6 | 374 | 155   | 1.92  | 4 |
| 463 | Fischer              | Revolution, Vacuum Pro 98           | 1998 | 699 | 191 | 347 | 325 | 264 | 242 | 25.0 | 16.0 | 16 | 20 | 340   | 324 | 131   | 0.395 | 4 |
| 464 | Wavex                | Wavex                               | 1998 | 690 | 201 | 364 | 335 | 285 | 264 | 24.0 | 23.0 | 16 | 19 | 315   | 340 | 155   | 0.355 | 4 |
| 465 | Wilson               | Hammer Outer Limit 3.5              | 1998 | 731 | 195 | 421 | 390 | 312 | 280 | 28.5 | 28.5 | 18 | 21 | 311.8 | 382 | 159.5 | 1.325 | 4 |
| 466 | Head                 | Ti.Heat, Anti.torsion               | 1999 | 684 | 183 | 362 | 345 | 262 | 244 | 21.0 | 21.0 | 18 | 19 | 288   | 344 | 150   | 0.405 | 4 |
| 467 | Gamma                | Big Bubba - Xtra long 32"           | 2000 | 811 | 237 | 420 | 398 | 308 | 285 | 27.0 | 25.0 | 18 | 21 | 282   | 430 | 117   | 0.545 | 4 |
| 468 | Volkl                | Catapult 2, generation II           | 2000 | 709 | 188 | 386 | 356 | 283 | 255 | 28.0 | 23.0 | 14 | 20 | 271   | 361 | 171   | 0.82  | 4 |
| 469 | Babolat              | Pure Drive                          | 2000 | 685 | 180 | 353 | 328 | 267 | 256 | 25.0 | 16.0 | 16 | 19 | 316   | 330 | 168.5 | 0.335 | 4 |
| 470 | Volkl                | Tour, 845 cm                        | 2000 | 687 | 192 | 355 | 330 | 267 | 245 | 23.0 | 23.0 | 16 | 18 | 292   | 330 | 146   | 0.495 | 4 |
| 471 | Volkl                | Quantum, catapult 3                 | 2000 | 704 | 187 | 388 | 364 | 287 | 250 | 29.0 | 22.0 | 14 | 20 | 268   | 353 | 184.5 | 0.655 | 4 |
| 472 | Tecno                | Spider 2 CPS                        | 2000 | 660 | 160 | 360 | 339 | 264 | 246 | 24.0 | 17.0 | 16 | 19 | 284   | 348 | 131.5 | 0.525 | 4 |
| 473 | ITF                  | Development Programme, Wide Body    | 2002 | 686 | 186 | 348 | 323 | 268 | 243 | 25.4 | 25.4 | 16 | 18 | 340   | 333 | 143   | 0.335 | 4 |
| 474 | Babolat              | Vs Nanotube                         | 2002 | 692 | 198 | 372 | 345 | 290 | 250 | 27.0 | 19.0 | 16 | 18 | 246   | 375 | 190   | 0.38  | 4 |
| 475 | Wilson               | Triad 2.0, Triad Hammer             | 2003 | 708 | 192 | 407 | 378 | 300 | 270 | 32.0 | 21.0 | 16 | 20 | 289   | 365 | 195   | 2.75  | 4 |
| 476 | Head                 | Air Cruiser, PowerMetal             | 2004 | 684 | 191 | 350 | 330 | 274 | 250 | 26.0 | 18.0 | 16 | 19 | 268   | 360 | 184   | 0.475 | 4 |
| 477 | Volkl                | Catapult V10, v-engine              | 2004 | 690 | 190 | 368 | 341 | 277 | 241 | 26.0 | 22.0 | 16 | 19 | 325   | 331 | 154   | 0.37  | 4 |

|     |           |                                   |      |     |     |     |     |     |     |      |      |    |    |       |     |       |       |   |
|-----|-----------|-----------------------------------|------|-----|-----|-----|-----|-----|-----|------|------|----|----|-------|-----|-------|-------|---|
| 478 | Wilson    | Hammer 6.7                        | 2005 | 688 | 180 | 371 | 347 | 258 | 231 | 28.1 | 28.1 | 16 | 20 | 296.7 | 381 | 127.5 | 0.675 | 4 |
| 479 | Dunlop    | Aerogel 200                       | 2005 | 691 | 190 | 348 | 322 | 253 | 233 | 22.2 | 21.8 | 16 | 18 | 364.3 | 323 | 124   | 0.5   | 4 |
| 480 | Yonex     | RA2000 Long                       | 2006 | 707 | 211 | 366 | 336 | 263 | 240 | 28.0 | 22.0 | 16 | 19 | 319   | 341 | 126.5 | 0.42  | 4 |
| 481 | Wilson    | Pro Staff Six One Tour            | 2006 | 683 | 196 | 345 | 312 | 252 | 237 | 17.9 | 17.7 | 16 | 19 | 363.1 | 318 | 140   | 0.73  | 4 |
| 482 | Head      | Prestige Team, Mid Plus           | 2007 | 686 | 201 | 357 | 338 | 270 | 244 | 21.0 | 19.0 | 18 | 19 | 310   | 345 | 138   | 0.39  | 4 |
| 483 | Head      | Radical, Flexpoint                | 2007 | 688 | 196 | 346 | 323 | 260 | 235 | 22.0 | 22.0 | 18 | 20 | 316   | 329 | 137   | 0.38  | 4 |
| 484 | Head      | Metallix 2, flexpoint, stabilizer | 2007 | 664 | 190 | 368 | 337 | 270 | 243 | 26.0 | 20.0 | 16 | 19 | 281   | 352 | 156.5 | 0.38  | 4 |
| 485 | Head      | Instinct Team, min plus           | 2007 | 684 | 182 | 355 | 335 | 270 | 248 | 26.0 | 17.0 | 16 | 19 | 283   | 353 | 147.5 | 0.53  | 4 |
| 486 | Head      | Extrememe Pro                     | 2007 | 685 | 186 | 350 | 321 | 275 | 251 | 26.0 | 17.0 | 16 | 19 | 341   | 315 | 161   | 0.34  | 4 |
| 487 | Head      | Ti.2000                           | 2008 | 686 | 202 | 360 | 340 | 278 | 255 | 23.0 | 17.0 | 16 | 19 | 281   | 340 | 123   | 0.29  | 4 |
| 488 | Head      | Heat, Flexpoint                   | 2008 | 683 | 183 | 360 | 335 | 264 | 240 | 24.0 | 24.0 | 18 | 19 | 303   | 330 | 144   | 0.36  | 4 |
| 489 | Prince    | Ozone 7                           | 2008 | 694 | 183 | 363 | 339 | 276 | 257 | 25.0 | 18.0 | 16 | 19 | 305   | 341 | 162   | 0.245 | 4 |
| 490 | Neox      | ET 320 Pro                        | 2008 | 686 | 200 | 363 | 335 | 270 | 240 | 25.0 | 19.0 | 16 | 20 | 344   | 318 | 148   | 0.395 | 4 |
| 491 | Neox      | ST 285, carving                   | 2008 | 680 | 194 | 360 | 335 | 270 | 240 | 32.0 | 23.0 | 16 | 20 | 284   | 345 | 155   | 0.495 | 4 |
| 492 | Babolat   | Aero Prop Drive                   | 2008 | 681 | 201 | 340 | 325 | 260 | 250 | 26.1 | 23.2 | 16 | 19 | 335.4 | 334 | 144.5 | 0.42  | 4 |
| 493 | Head      | Crossbow 6                        | 2009 | 695 | 185 | 368 | 340 | 287 | 262 | 30.0 | 15.9 | 16 | 19 | 276   | 364 | 175   | 0.4   | 4 |
| 494 | Head      | Radical Lite                      | 2009 | 685 | 193 | 352 | 330 | 266 | 258 | 24.0 | 20.0 | 16 | 19 | 276   | 345 | 153   | 0.385 | 4 |
| 495 | Head      | Speed MP youtek                   | 2009 | 685 | 190 | 349 | 325 | 272 | 250 | 20.0 | 16.0 | 18 | 20 | 312   | 328 | 141   | 0.38  | 4 |
| 496 | Prince    | Triple Threat                     | 2009 | 713 | 176 | 388 | 358 | 285 | 260 | 29.0 | 18.0 | 16 | 19 | 283   | 360 | 221.5 | 0.555 | 4 |
| 497 | Slazenger | Quad 305 Flex                     | 2009 | 690 | 203 | 332 | 322 | 251 | 237 | 22.1 | 21.9 | 16 | 18 | 357.7 | 313 | 159   | 0.295 | 4 |
| 498 | Head      | Six, Youtek                       | 2010 | 695 | 194 | 360 | 340 | 281 | 260 | 28.0 | 19.0 | 16 | 19 | 282   | 367 | 170   | 0.425 | 4 |
| 499 | Wilson    | K Factor, K Tour Team FX          | 2010 | 694 | 180 | 366 | 342 | 271 | 237 | 24.0 | 23.0 | 16 | 19 | 300   | 339 | 155   | 0.41  | 4 |
| 500 | Wilson    | Pro Team FX                       | 2010 | 692 | 200 | 354 | 330 | 273 | 245 | 25.0 | 18.0 | 16 | 19 | 294   | 337 | 160   | 0.375 | 4 |
| 501 | Head      | -                                 | 2010 | 686 | 189 | 342 | 322 | 275 | 261 | 25.4 | 21.8 | 16 | 19 | 322.4 | 321 | 146   | 0.57  | 4 |
| 502 | Prince    | 03 White                          | 2010 | 696 | 220 | 341 | 325 | 265 | 251 | 24.8 | 22.9 | 16 | 19 | 318.2 | 342 | 140   | 0.69  | 4 |
| 503 | Head      | Crossbow, Airflow 3               | 2011 | 685 | 198 | 353 | 325 | 275 | 254 | 28.0 | 14.0 | 16 | 19 | 282   | 350 | 178.5 | 0.32  | 4 |
| 504 | Prince    | Rebel EXO3                        | 2011 | 686 | 197 | 345 | 324 | 256 | 235 | 24.8 | 24.8 | 18 | 20 | 310   | 340 | 145   | 0.535 | 4 |
| 505 | Prince    | EXO3                              | 2012 | 695 | 230 | 350 | 337 | 270 | 250 | 20.0 | 18.3 | 16 | 18 | 342.9 | 322 | 122.5 | 1.21  | 4 |
| 506 | Dunlop    | Biomimetic 500 Tour               | 2012 | 680 | 210 | 340 | 322 | 260 | 243 | 21.9 | 21.9 | 16 | 18 | 342.4 | 322 | 158   | 1.175 | 4 |
| 507 | Head      | YouTek IG Instinct MP             | 2012 | 687 | 215 | 351 | 332 | 255 | 246 | 25.0 | 21.4 | 16 | 19 | 322.9 | 325 | 147   | 0.775 | 4 |
| 508 | Head      | Etreme IG                         | 2013 | 685 | 193 | 347 | 322 | 278 | 255 | 26.0 | 18.0 | 16 | 19 | 320   | 332 | 148   | 0.435 | 4 |
| 509 | Prokennex | No.20, Core 1 System              | 2013 | 698 | 175 | 368 | 346 | 276 | 255 | 28.0 | 20.0 | 16 | 19 | 294   | 345 | 158   | 0.34  | 6 |
| 510 | Prince    | Rebel 98                          | 2013 | 689 | 196 | 361 | 335 | 256 | 235 | 22.0 | 21.0 | 16 | 20 | 316   | 328 | 140   | 0.405 | 4 |
| 511 | Babolat   | Pure Storm                        | 2013 | 689 | 185 | 354 | 328 | 264 | 240 | 23.0 | 22.0 | 16 | 20 | 307   | 336 | 140   | 0.4   | 4 |
| 512 | Wilson    | Pro staff RF97                    | 2014 | 685 | 180 | 343 | 324 | 265 | 237 | 23.0 | 22.0 | 16 | 19 | 356   | 322 | 150   | 0.47  | 4 |
| 513 | Prince    | Warrior 100, EXO3                 | 2014 | 690 | 202 | 356 | 330 | 270 | 249 | 29.0 | 26.0 | 16 | 19 | 321   | 330 | 147   | 0.33  | 4 |
| 514 | Babolat   | Pure Strike                       | 2014 | 686 | 191 | 343 | 321 | 258 | 243 | 22.0 | 21.0 | 16 | 19 | 327   | 335 | 151   | 0.315 | 4 |
| 515 | HEAD      | Extreme Rev Pro                   | 2015 | 688 | 194 | 357 | 318 | 281 | 256 | 26.0 | 25.0 | 16 | 16 | 295   | 353 | 139   | 0.4   | 4 |
| 516 | HEAD      | Prestige M7                       | 2016 | 686 | 184 | 348 | 324 | 260 | 237 | 21.0 | 21.0 | 18 | 20 | 335   | 319 | 145.5 | 0.365 | 4 |
| 517 | HEAD      | Radical MPA                       | 2016 | 684 | 194 | 354 | 328 | 264 | 242 | 24.0 | 12.0 | 16 | 16 | 315   | 325 | 152   | 0.355 | 4 |
| 518 | Snauwaert | Grinta 98                         | 2016 | 685 | 211 | 340 | 324 | 273 | 257 | 22.2 | 22.0 | 16 | 16 | 335.6 | 321 | 138   | 0.48  | 4 |
| 519 | Wilson    | Blade 98                          | 2017 | 685 | 184 | 352 | 326 | 263 | 240 | 21.0 | 21.0 | 16 | 19 | 327   | 349 | 142   | 0.725 | 4 |

|     |         |                            |      |     |     |     |     |     |     |      |      |    |    |       |     |     |       |   |
|-----|---------|----------------------------|------|-----|-----|-----|-----|-----|-----|------|------|----|----|-------|-----|-----|-------|---|
| 520 | HEAD    | Speed MP                   | 2017 | 684 | 188 | 353 | 330 | 266 | 245 | 23.0 | 17.0 | 16 | 19 | 316   | 328 | 144 | 0.365 | 4 |
| 521 | HEAD    | Instinct Adaptive          | 2017 | 700 | 200 | 358 | 330 | 270 | 248 | 27.0 | 18.0 | 16 | 19 | 315   | 338 | 142 | 0.385 | 4 |
| 522 | HEAD    | Instinct PWR               | 2017 | 700 | 196 | 390 | 376 | 278 | 255 | 30.0 | 20.0 | 16 | 19 | 220   | 383 | 172 | 0.65  | 4 |
| 523 | HEAD    | MXG3, Magnesium 3D Chassis | 2017 | 685 | 190 | 368 | 340 | 265 | 241 | 26.0 | 10.0 | 16 | 18 | 316   | 331 | 159 | 0.375 | 4 |
| 524 | Babolat | Pure Aero                  | 2017 | 685 | 188 | 350 | 325 | 270 | 250 | 25.0 | 17.0 | 16 | 19 | 325   | 333 | 150 | 0.345 | 4 |
| 525 | Head    | Prestige Zepp              | 2017 | 685 | 184 | 345 | 324 | 260 | 237 | 27.6 | 27.6 | 16 | 19 | 325.5 | 329 | 147 | 0.505 | 4 |
